# Supplementary material for: Red to NIR-emissive anthracene-conjugated PMI dyes with dual functions: singlet-oxygen response and lipid-droplet imaging
Source: Royal Society of Chemistry journal article supplement (doi:10.1039/d2tb00349j), 2022-01-01
Supplement: d2tb00349j1.pdf [file d2tb00349j1.pdf]

## Electronic Supporting Information (ESI)

### **Red to NIR-emissive anthracene-conjugated PMI dyes with dual functions: singlet-oxygen response and lipid-droplet imaging†**

Rupam Roy,<sup>\*a#</sup> Aasif Khan,<sup>a#</sup> Tanoy Dutta,<sup>a</sup> and Apurba Lal Koner<sup>\*a</sup>

(a) Bionanotechnology Laboratory, Department of Chemistry, Indian Institute of Science Education and Research Bhopal, Bhopal By-pass Road, Bhauri, Bhopal 462066, Madhya Pradesh, India. E-mail: [rupam16@iiserb.ac.in](mailto:rupam16@iiserb.ac.in), [akoner@iiserb.ac.in](mailto:akoner@iiserb.ac.in)

# These authors contributed to this work equally.

## Table of Content

|                                                                                                                                                                                             |    |
|---------------------------------------------------------------------------------------------------------------------------------------------------------------------------------------------|----|
| <b>Fig. S1:</b> $^1\text{H}$ NMR spectrum of 9-phenyl anthracene ( <b>I</b> ) recorded in $\text{CDCl}_3$ at 500MHz.....                                                                    | 4  |
| <b>Fig. S2:</b> $^1\text{H}$ NMR spectrum of 9-bromo-10-phenylanthracene ( <b>II</b> ) in $\text{CDCl}_3$ .....                                                                             | 4  |
| <b>Fig. S3:</b> $^1\text{H}$ NMR spectrum of 4-(10-bromoanthracen-9-yl)- <i>N,N</i> -dimethylaniline ( <b>III</b> ).....                                                                    | 5  |
| <b>Fig. S4:</b> $^1\text{H}$ NMR spectrum for compound <b>1</b> .....                                                                                                                       | 5  |
| <b>Fig. S5:</b> $^1\text{H}$ NMR spectrum for compound <b>2</b> .....                                                                                                                       | 6  |
| <b>Fig. S6:</b> $^1\text{H}$ NMR spectrum for compound <b>3</b> .....                                                                                                                       | 6  |
| <b>Fig. S7:</b> $^{13}\text{C}$ NMR spectrum for compound <b>2</b> .....                                                                                                                    | 7  |
| <b>Fig. S8:</b> $^{13}\text{C}$ NMR spectrum for compound <b>3</b> .....                                                                                                                    | 7  |
| <b>Fig. S9:</b> APCI mass spectrum for compound <b>1</b> .....                                                                                                                              | 8  |
| <b>Fig. S10:</b> APCI mass spectrum for compound <b>2</b> .....                                                                                                                             | 9  |
| <b>Fig. S11:</b> APCI mass spectrum for compound <b>3</b> .....                                                                                                                             | 10 |
| <b>Fig. S12:</b> Variable temperature (VT)-dependent $^1\text{H}$ NMR spectra of compound <b>1</b> in $\text{CDCl}_3$ .....                                                                 | 11 |
| <b>Fig. S13:</b> Optical purity plot for compound <b>1</b> .....                                                                                                                            | 12 |
| <b>Fig. S14:</b> Optical purity plot for compound <b>2</b> .....                                                                                                                            | 12 |
| <b>Fig. S15:</b> Optical purity plot for compound <b>3</b> .....                                                                                                                            | 13 |
| <b>Fig. S16:</b> Photostability plots for probe <b>1</b> , <b>2</b> , and <b>3</b> .....                                                                                                    | 13 |
| <b>Fig. S17:</b> Time-dependent UV-Vis. absorption spectra in $\text{CDCl}_3$ for <b>1</b> (a), <b>2</b> (b), and <b>3</b> (c) and Methylene blue (MB) under visible light irradiation..... | 13 |
| <b>Fig. S18:</b> Plot of initial and final absorption spectra for compound <b>1</b> (a), <b>2</b> (b), and <b>3</b> (c).....                                                                | 14 |
| <b>Scheme S1:</b> Schematic representation for $^1\text{O}_2$ reaction kinetics experiment.....                                                                                             | 14 |
| <b>Fig. S19:</b> Plots for representing the change in fluorescence intensity ratio with time on reaction with $^1\text{O}_2$ for <b>1</b> and <b>2</b> in $\text{CDCl}_3$ .....             | 14 |
| <b>Fig. S20:</b> Time-dependent emission spectra for (a) <b>1</b> , (b) <b>2</b> , and (c) <b>3</b> . in dark.....                                                                          | 15 |
| <b>Fig. S21:</b> Selectivity plot for <b>2</b> .....                                                                                                                                        | 15 |
| <b>Fig. S22:</b> Selectivity plot for <b>3</b> .....                                                                                                                                        | 16 |
| <b>Fig. S23:</b> APCI mass spectrum for endoperoxide of <b>2</b> .....                                                                                                                      | 17 |
| <b>Fig. S24:</b> MALDI mass spectrum for endoperoxide of <b>3</b> .....                                                                                                                     | 18 |
| <b>Fig. S25:</b> Representation of PMI and anthracene planes and their corresponding dihedral angle in optimized geometry of <b>1</b> .....                                                 | 19 |

|                                                                                                                                                              |              |
|--------------------------------------------------------------------------------------------------------------------------------------------------------------|--------------|
| <b>Fig. S26:</b> Representation of PMI and anthracene planes and their corresponding dihedral angle in optimized geometry of <b>2</b> .....                  | <b>19</b>    |
| <b>Fig. S27:</b> Representation of Phenyl and anthracene planes and their corresponding dihedral angle in optimized geometry of <b>2</b> .....               | <b>20</b>    |
| <b>Fig. S28:</b> Representation of N, N-dimethyl Phenyl and anthracene planes and their corresponding dihedral angle in optimized geometry of <b>3</b> ..... | <b>20</b>    |
| <b>Table S1:</b> Calculated energy of Kohn-Sham molecular orbitals (MO) of compound <b>1</b> .....                                                           | <b>22</b>    |
| <b>Fig. S29:</b> Representation of HOMO and LUMO electronic distributions for compound <b>1</b> .....                                                        | <b>23</b>    |
| <b>Table S2:</b> Calculated energy of Kohn-Sham molecular orbitals (MO) of compound <b>2</b> .....                                                           | <b>26</b>    |
| <b>Fig. S30:</b> Representation of HOMO and LUMO electronic distributions for compound <b>2</b> .....                                                        | <b>26</b>    |
| <b>Table S3:</b> Calculated energy of Kohn-Sham molecular orbitals (MO) of compound <b>3</b> .....                                                           | <b>29</b>    |
| <b>Table S4:</b> Summarization of theoretical data obtained from DFT calculations.....                                                                       | <b>29</b>    |
| <b>Table S5:</b> Calculated energy of Kohn-Sham molecular orbitals (MO) of <b>1-Ep</b> .....                                                                 | <b>31</b>    |
| <b>Fig. S31:</b> Representation of HOMO and LUMO electronic distributions for compound <b>1-EP</b> .....                                                     | <b>32</b>    |
| <b>Table S6:</b> Calculated energy of Kohn-Sham molecular orbitals (MO) of <b>2-Ep</b> .....                                                                 | <b>34</b>    |
| <b>Fig. S32:</b> Representation of HOMO and LUMO electronic distributions for compound <b>2-EP</b> .....                                                     | <b>35</b>    |
| <b>Table S7:</b> Calculated energy of Kohn-Sham molecular orbitals (MO) of <b>3-Ep</b> .....                                                                 | <b>37</b>    |
| <b>Fig. S33:</b> Representation of HOMO and LUMO electronic distributions for compound <b>3-EP</b> .....                                                     | <b>38</b>    |
| <b>Table S8:</b> Thermodynamic feasibility of $^1\text{O}_2$ reaction for compounds <b>1-3</b> .....                                                         | <b>38</b>    |
| <b>Fig. S34:</b> Orbital picture and the band gap of compound <b>1-3</b> and their corresponding endoperoxides.....                                          | <b>39</b>    |
| <b>Fig. S35:</b> MTT assay showing cell viability in the presence of compound <b>2</b> .....                                                                 | <b>39</b>    |
| <b>Fig. S36:</b> Confocal spectral scanning experiment.....                                                                                                  | <b>40</b>    |
| <b>Fig. S37:</b> Confocal live-cell co-localization experiments for <b>2</b> .....                                                                           | <b>41</b>    |
| <b>Fig. S38:</b> Confocal live-cell co-localization experiments for <b>1</b> .....                                                                           | <b>42</b>    |
| <b>Fig. S39:</b> CLSM experiment of <b>2</b> with 5-ALA.....                                                                                                 | <b>42-43</b> |

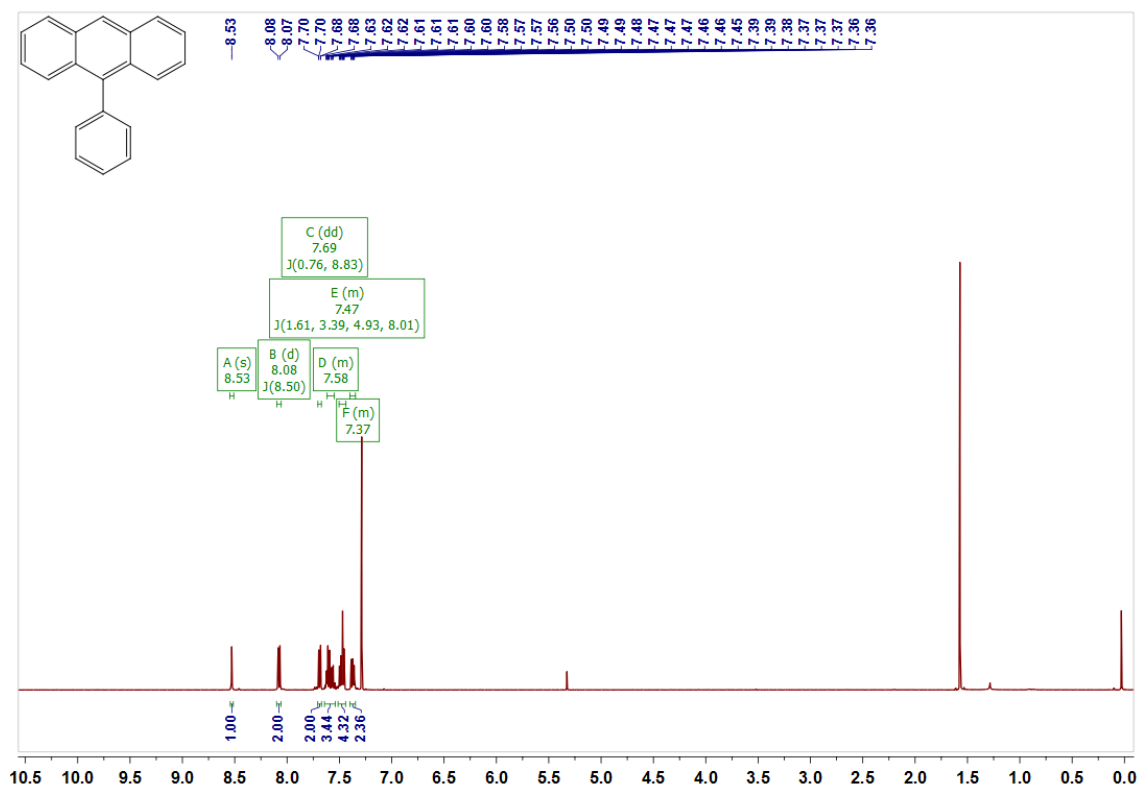

**Fig. S1**  $^1\text{H}$  NMR spectrum of 9-phenyl anthracene (**I**) recorded in  $\text{CDCl}_3$  at 500 MHz.

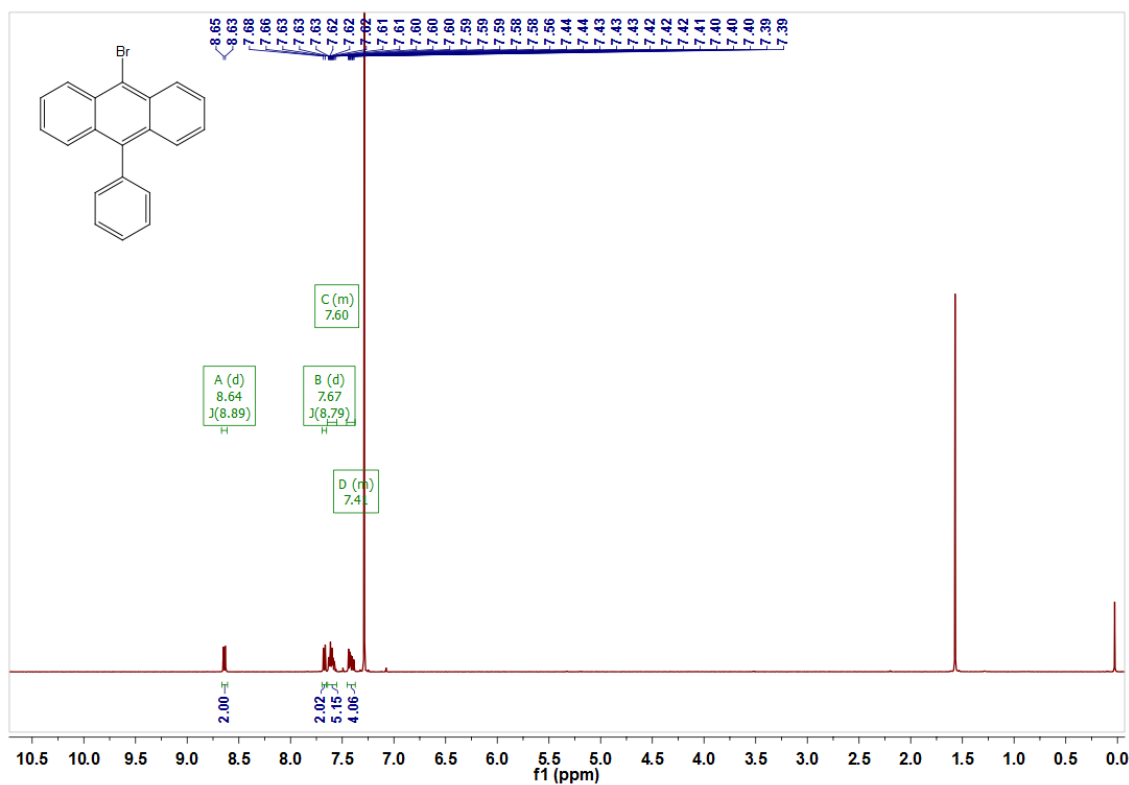

**Fig. S2**  $^1\text{H}$  NMR spectrum of 9-bromo-10-phenylanthracene (**II**) recorded in  $\text{CDCl}_3$  at 500 MHz.



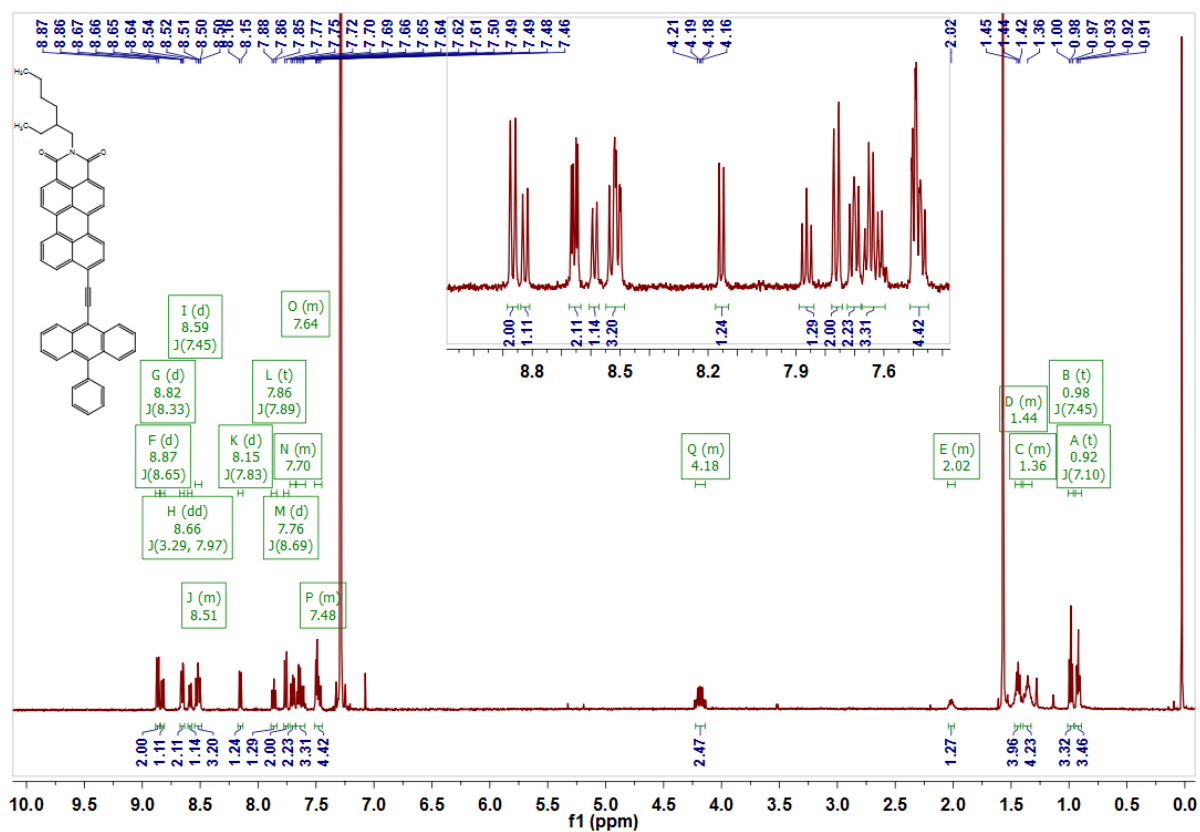

Fig. S5 <sup>1</sup>H NMR spectrum for compound 2 recorded in CDCl<sub>3</sub> at 500 MHz.

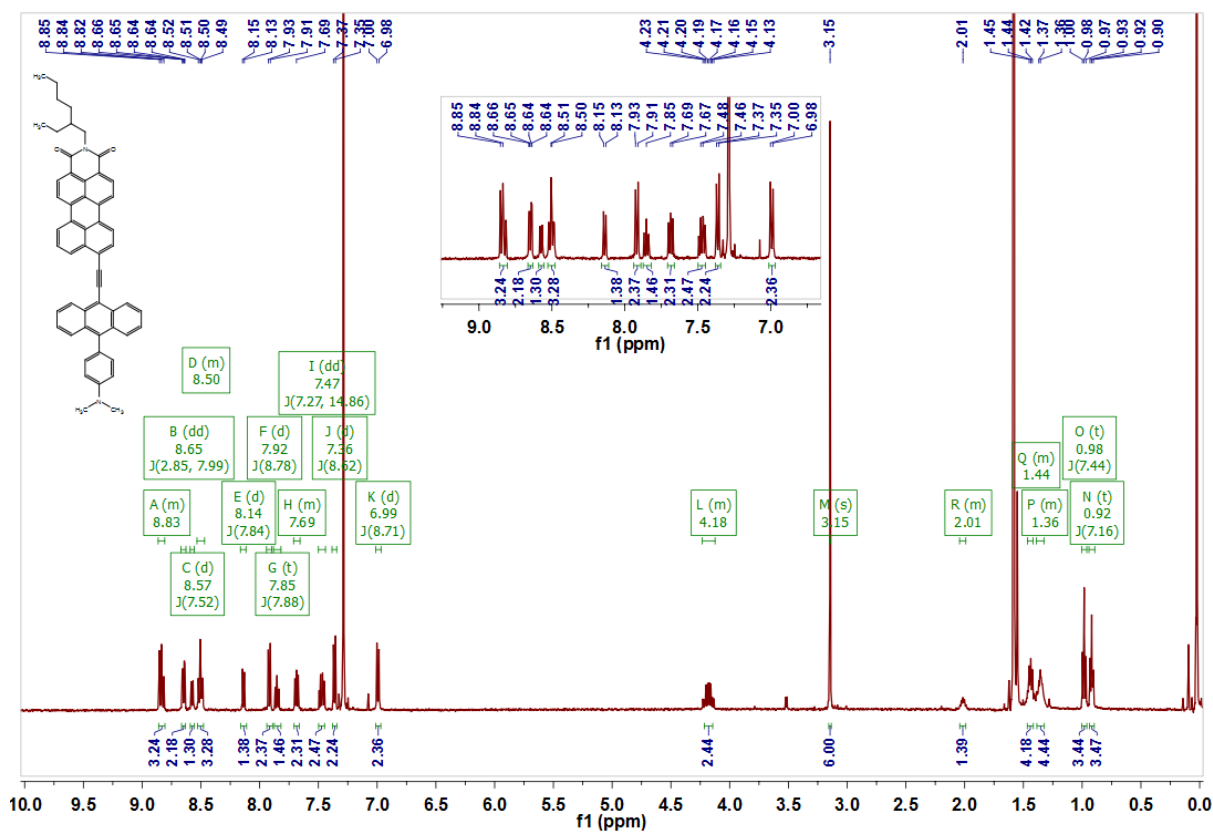

Fig. S6 <sup>1</sup>H NMR spectrum for compound 3 recorded in CDCl<sub>3</sub> at 500 MHz.

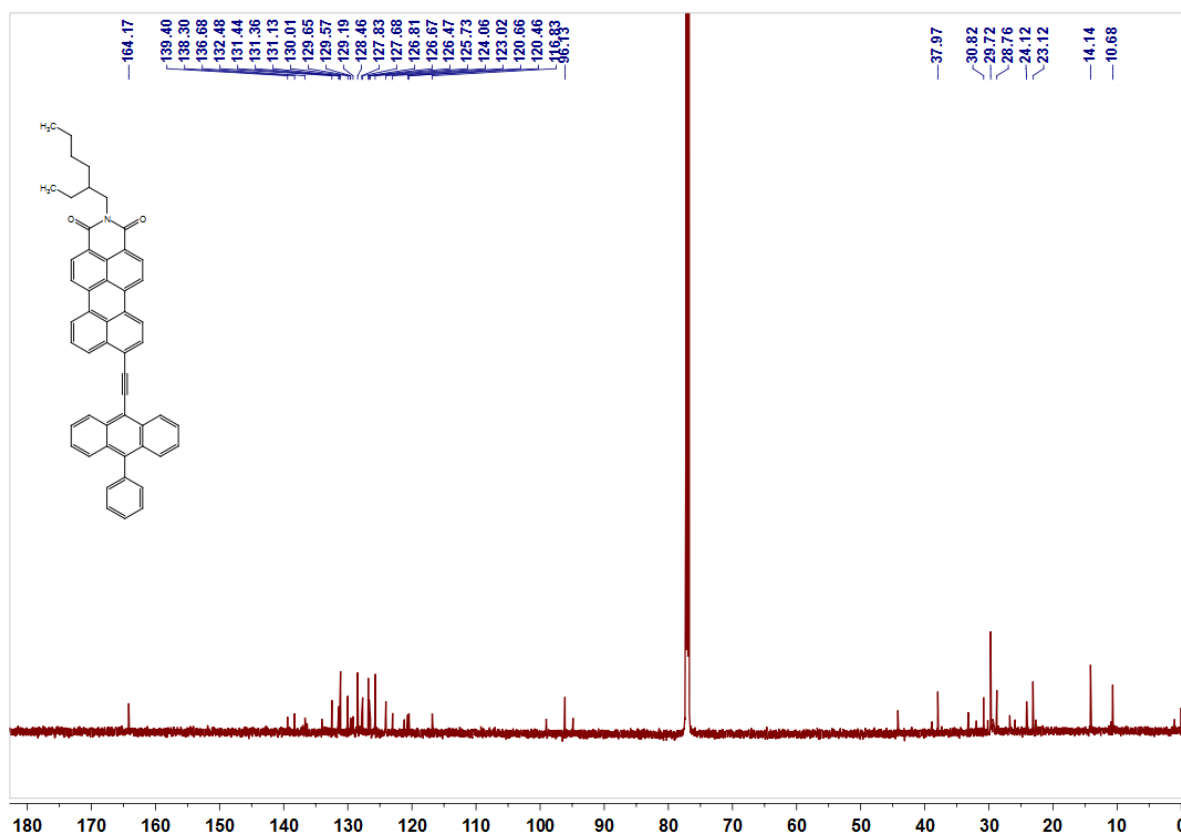

Fig. S7  $^{13}\text{C}$  NMR spectrum for compound **2** recorded in  $\text{CDCl}_3$  at 175 MHz.

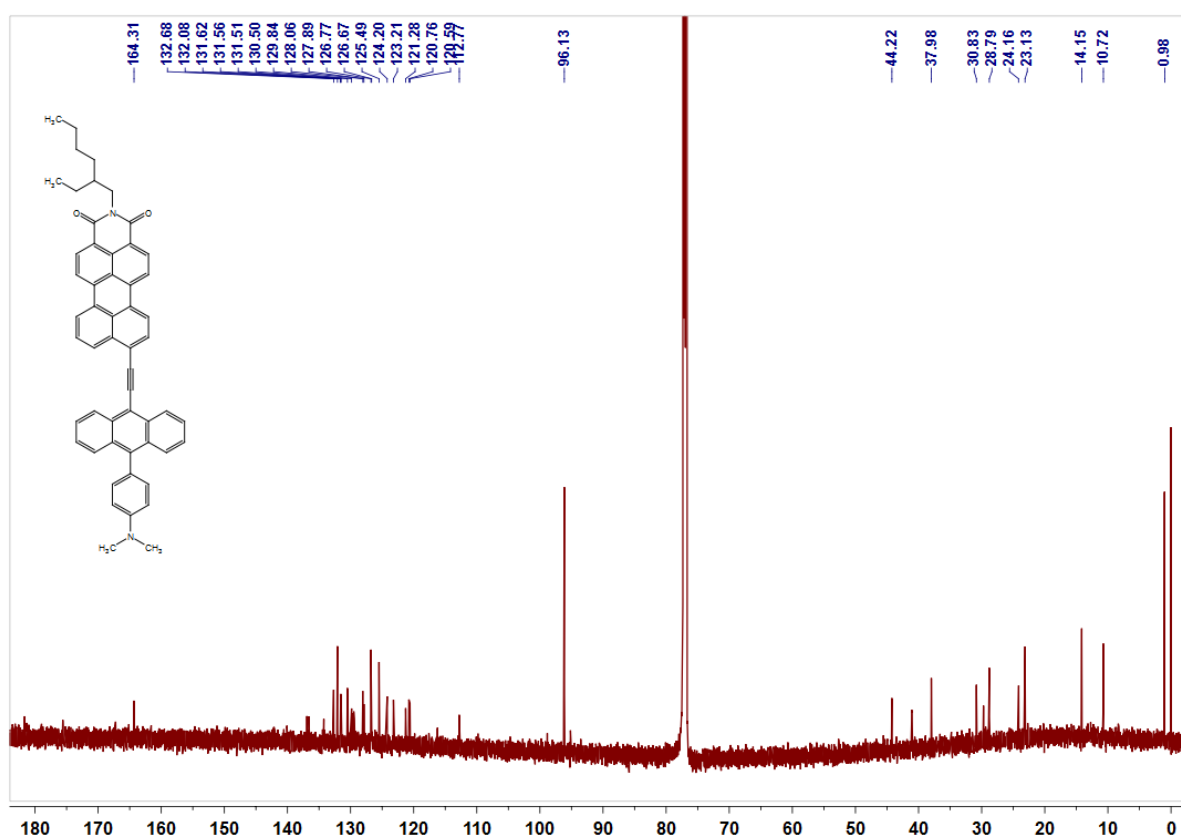

Fig. S8  $^{13}\text{C}$  NMR spectrum for compound **3** recorded in  $\text{CDCl}_3$  at 175 MHz.

**Acquisition Parameter**

|             |            |                       |           |                  |           |
|-------------|------------|-----------------------|-----------|------------------|-----------|
| Source Type | APCI       | Ion Polarity          | Positive  | Set Nebulizer    | 2.5 Bar   |
| Focus       | Not active | Set Capillary         | 4500 V    | Set Dry Heater   | 200 °C    |
| Scan Begin  | 50 m/z     | Set End Plate Offset  | -500 V    | Set Dry Gas      | 4.0 l/min |
| Scan End    | 3000 m/z   | Set Collision Cell RF | 300.0 Vpp | Set Divert Valve | Waste     |

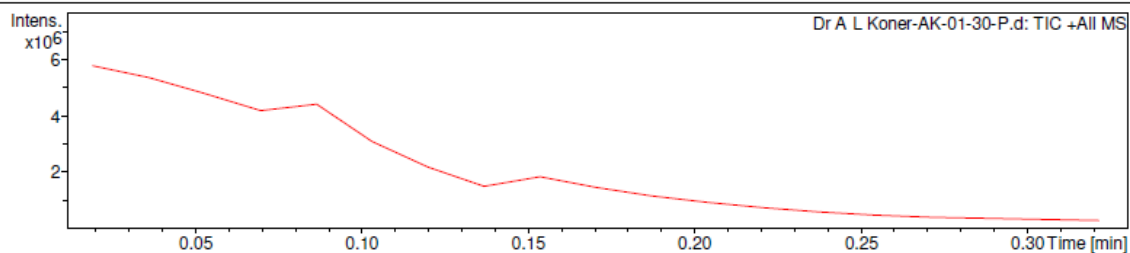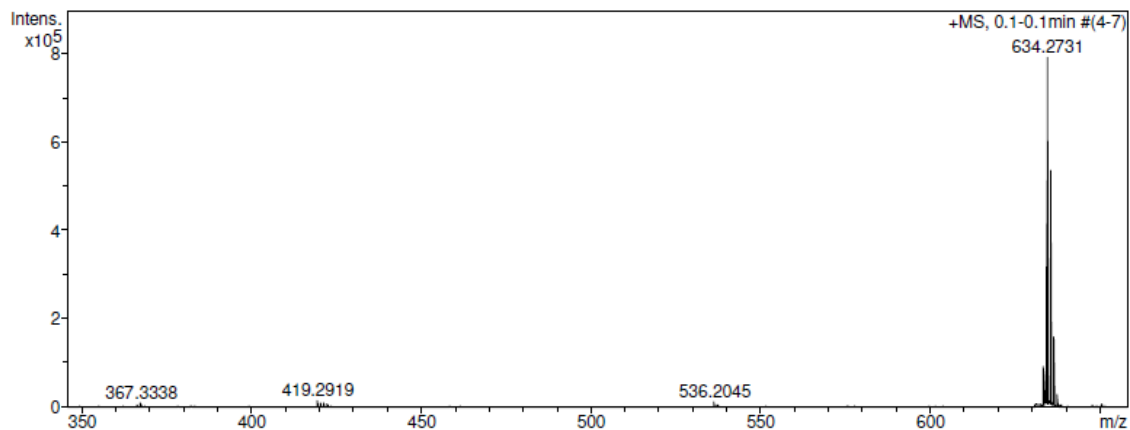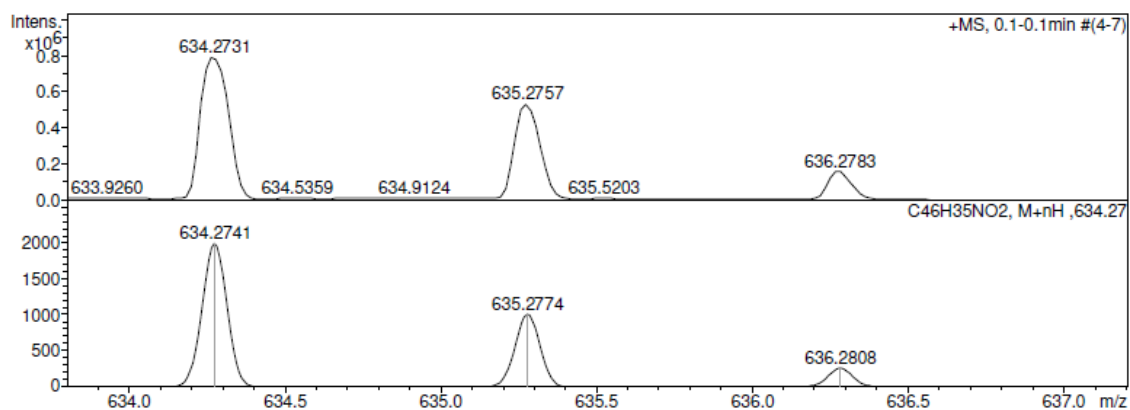

**Fig. S9** APCI mass spectrum for compound **1**; **Calculated mass** – 633.2668 Da and **Obtained mass** –  $m/z$  634.2731 Da  $[M+H]^+$ .



**Acquisition Parameter**

|             |            |                       |           |                  |           |
|-------------|------------|-----------------------|-----------|------------------|-----------|
| Source Type | APCI       | Ion Polarity          | Positive  | Set Nebulizer    | 0.4 Bar   |
| Focus       | Not active | Set Capillary         | 4000 V    | Set Dry Heater   | 200 °C    |
| Scan Begin  | 50 m/z     | Set End Plate Offset  | -500 V    | Set Dry Gas      | 4.0 l/min |
| Scan End    | 3000 m/z   | Set Collision Cell RF | 600.0 Vpp | Set Divert Valve | Source    |

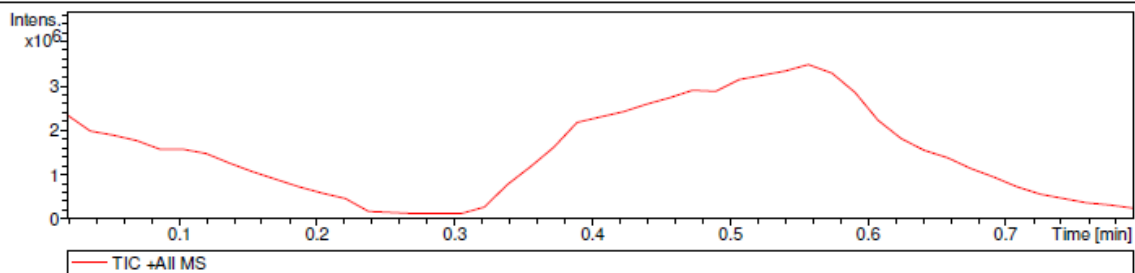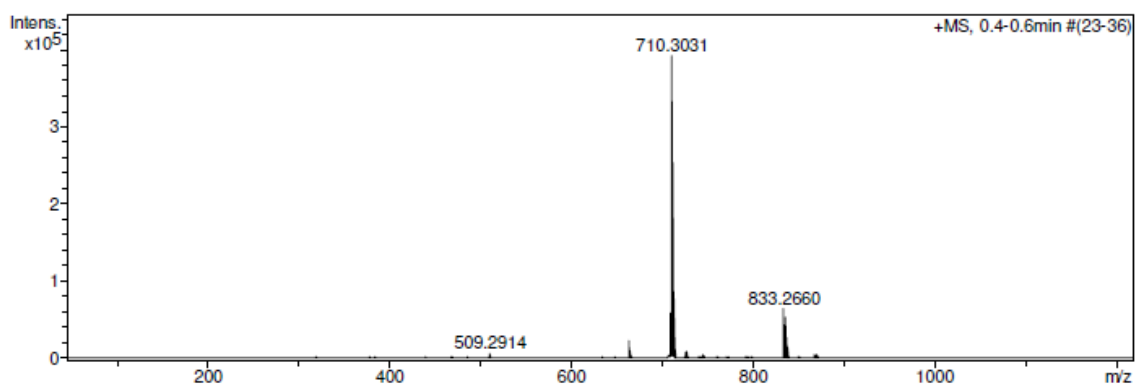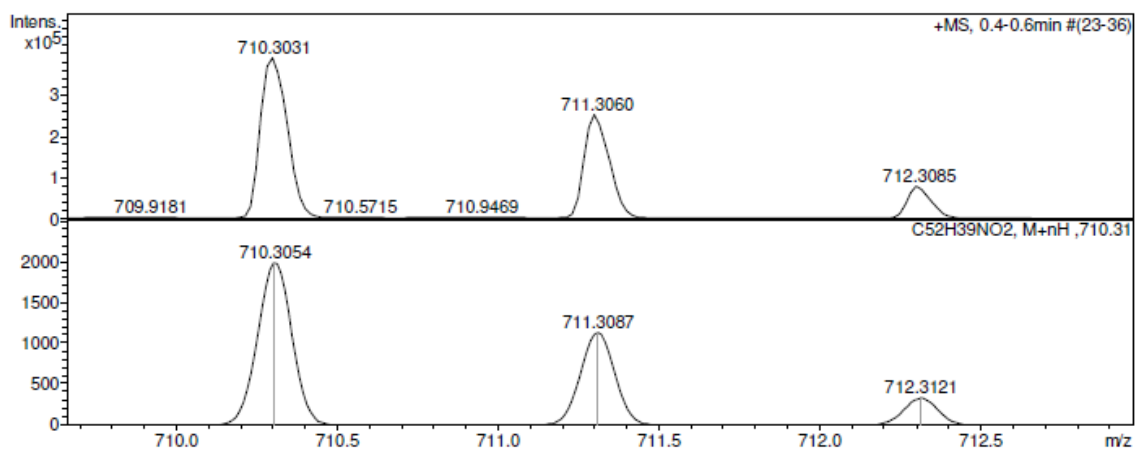

**Fig. S10** APCI mass spectrum for compound **2**, Calculated mass – 709.2981 Da and Obtained mass –  $m/z$  710.3031 Da  $[M+H]^+$ .

**Acquisition Parameter**

|             |            |                       |           |                  |           |
|-------------|------------|-----------------------|-----------|------------------|-----------|
| Source Type | APCI       | Ion Polarity          | Positive  | Set Nebulizer    | 2.5 Bar   |
| Focus       | Not active | Set Capillary         | 4000 V    | Set Dry Heater   | 200 °C    |
| Scan Begin  | 50 m/z     | Set End Plate Offset  | -500 V    | Set Dry Gas      | 4.0 l/min |
| Scan End    | 3000 m/z   | Set Collision Cell RF | 600.0 Vpp | Set Divert Valve | Waste     |

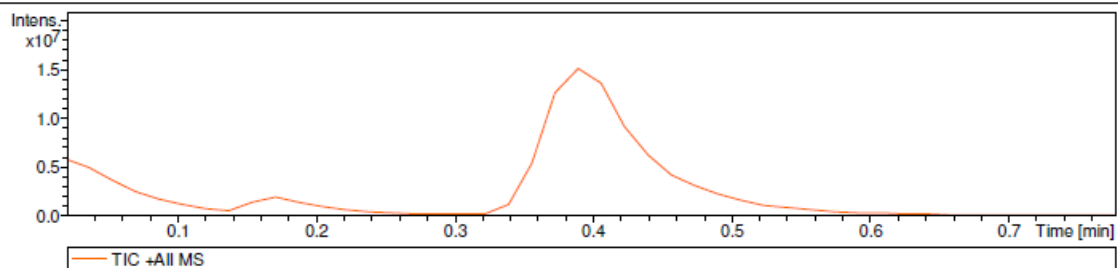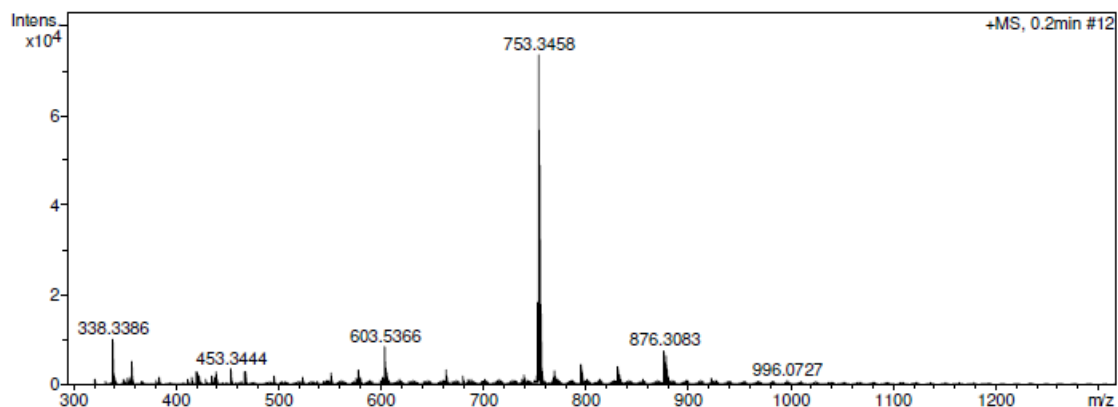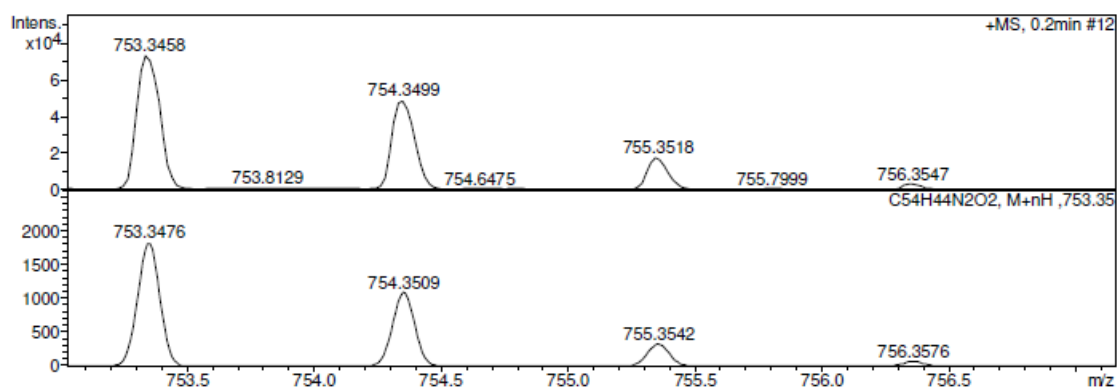

**Fig. S11** APCI mass spectrum for compound **3**, **Calculated mass** – 752.3403 Da and **Obtained mass** –  $m/z$  753.3486 Da  $[M+H]^+$ .

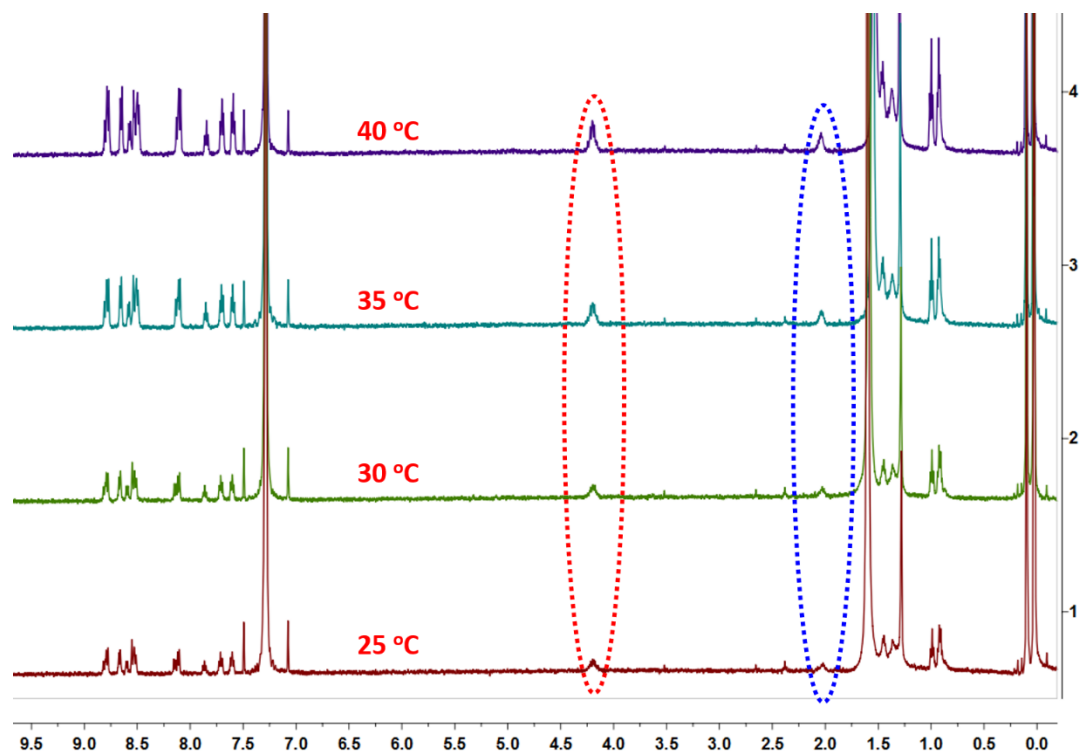

**Fig. S12** Variable temperature (VT)-dependent  $^1\text{H}$  NMR spectra of compound **1** in  $\text{CDCl}_3$ .

**Note:** To check the effect of aggregation in  $^1\text{H}$  NMR spectra, we have carried out the variable temperature (VT)-dependent  $^1\text{H}$  NMR study of probe **1** (PMI-Anth) (the most hydrophobic and planer molecule studied in this and prone to aggregation). This study demonstrates that while increasing temperature from 25 °C to 40 °C, the  $^1\text{H}$  NMR peaks in the aromatic region become well-resolved with gaining a little high intensity. This spectral comparison manifests that there may be a possibility of aggregation for probe **1** at RT (25 °C) but at moderately high temperature, the peaks become sharp due to an increase in solubility of the compound in  $\text{CDCl}_3$ .

Optical purity plots:

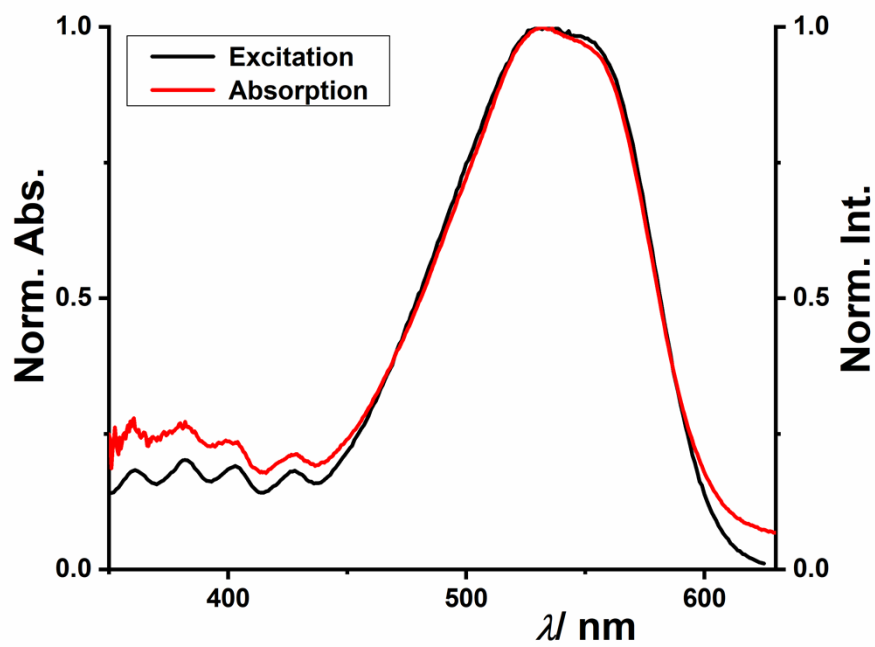

Fig. S13 Optical purity plot for compound 1 measured in  $\text{CHCl}_3$ .

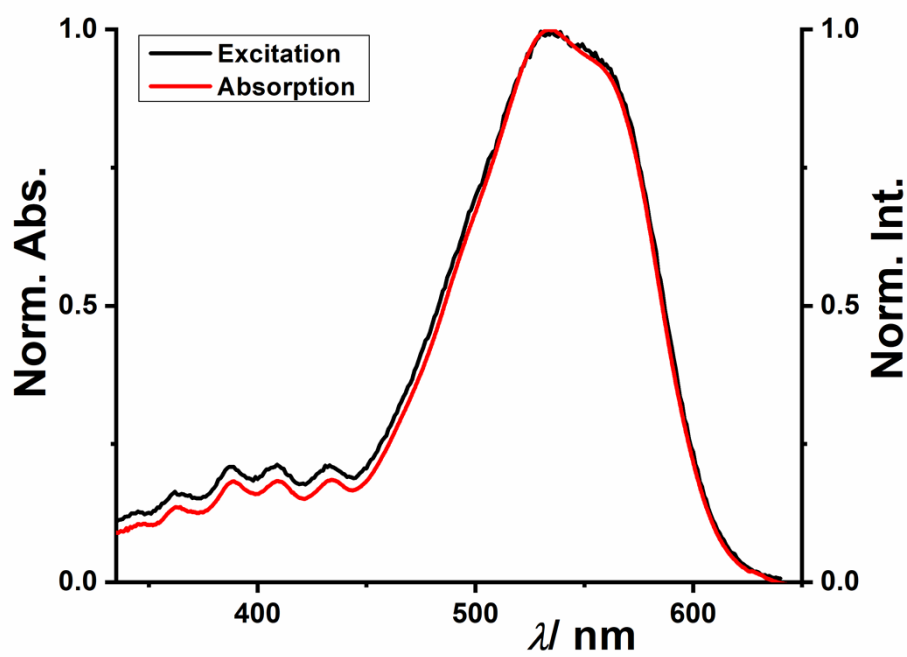

Fig. S14 Optical purity plot for compound **2** measured in  $\text{CHCl}_3$ .

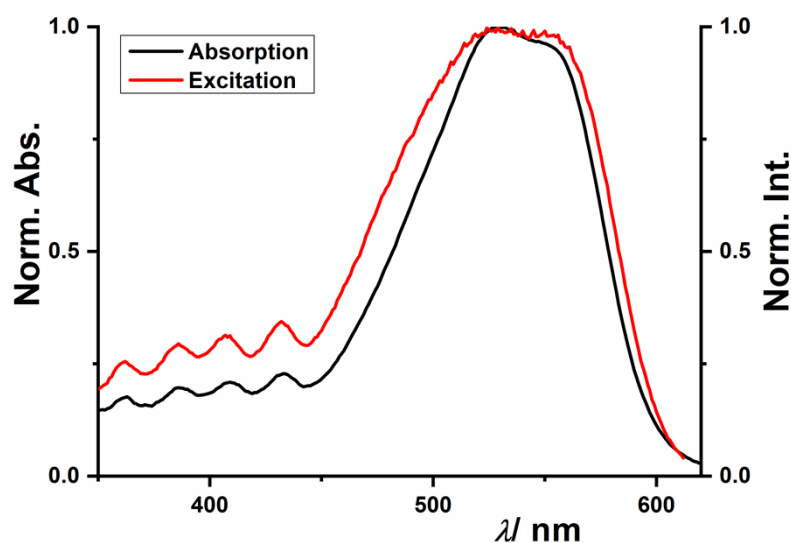

Fig. S15 Optical purity plot for compound **3** measured in  $\text{CHCl}_3$ .

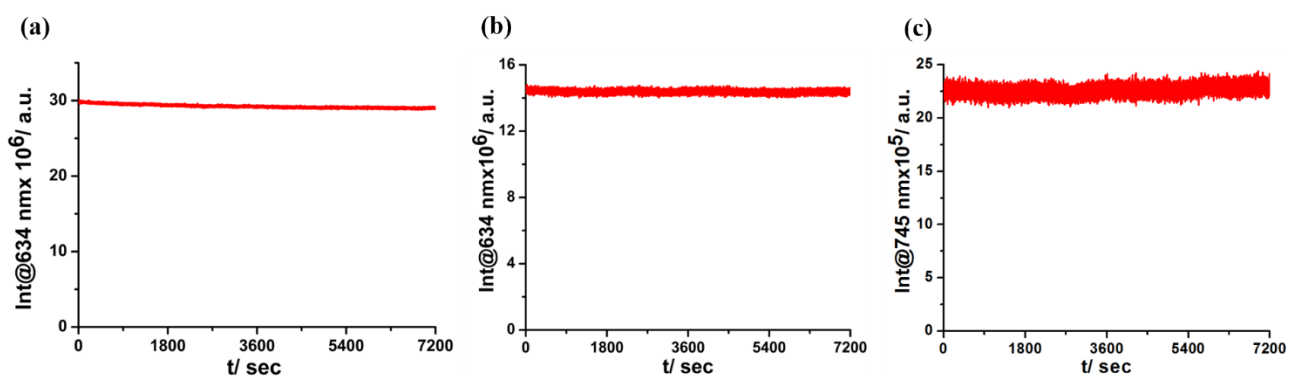

Fig. S16 Photostability plots for compound (a) **1**, (b) **2**, and (c) **3** in  $\text{CHCl}_3$  at  $\lambda_{\text{ex}} = 533$  nm using 70 lx intensity.

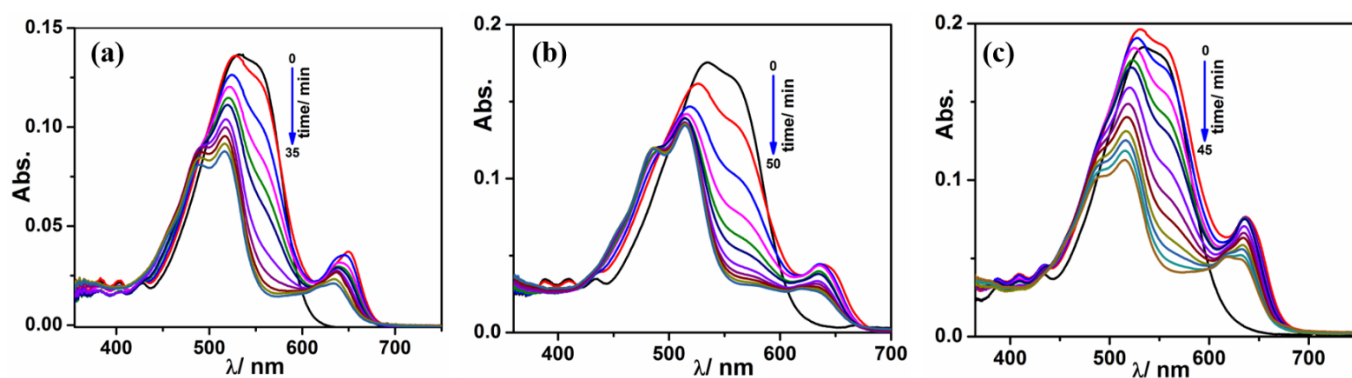

Fig. S17 Time-dependent UV-Vis. absorption spectra in  $\text{CDCl}_3$  for (a) **1**, (b) **2**, and (c) **3** in absence (black color spectrum) and in presence of Methylene blue (MB) under visible light irradiation [  $[\mathbf{1}/\mathbf{2}/\mathbf{3}] = 5 \mu\text{M}$ , MB:  $2 \mu\text{M}$  ].

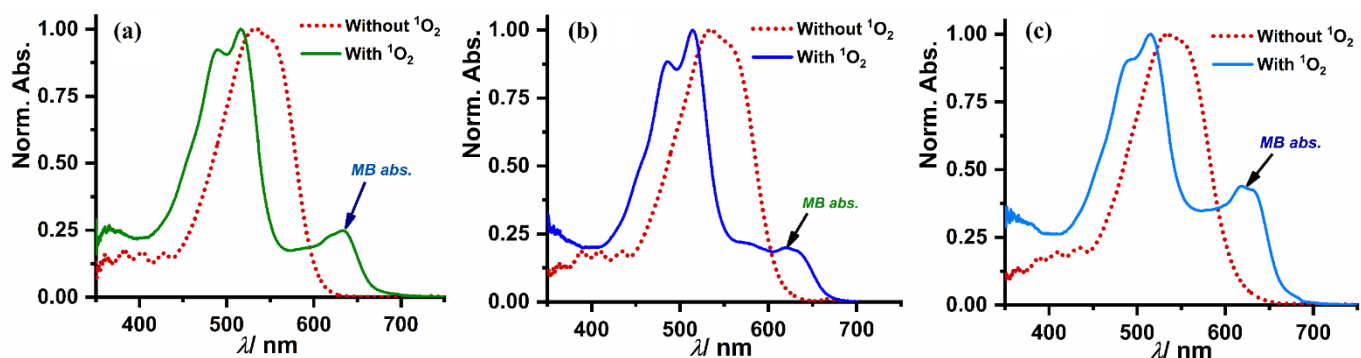

**Fig. S18** Representation of initial (before reaction) and final (after reaction) absorption spectra for compound 1 (a), 2 (b), and 3 (c) respectively.

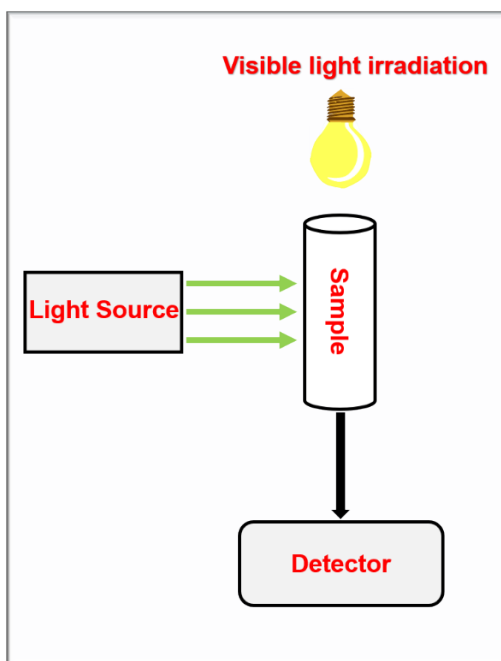

**Scheme S1** Schematic diagram for  $^1\text{O}_2$  reaction kinetics experiment.

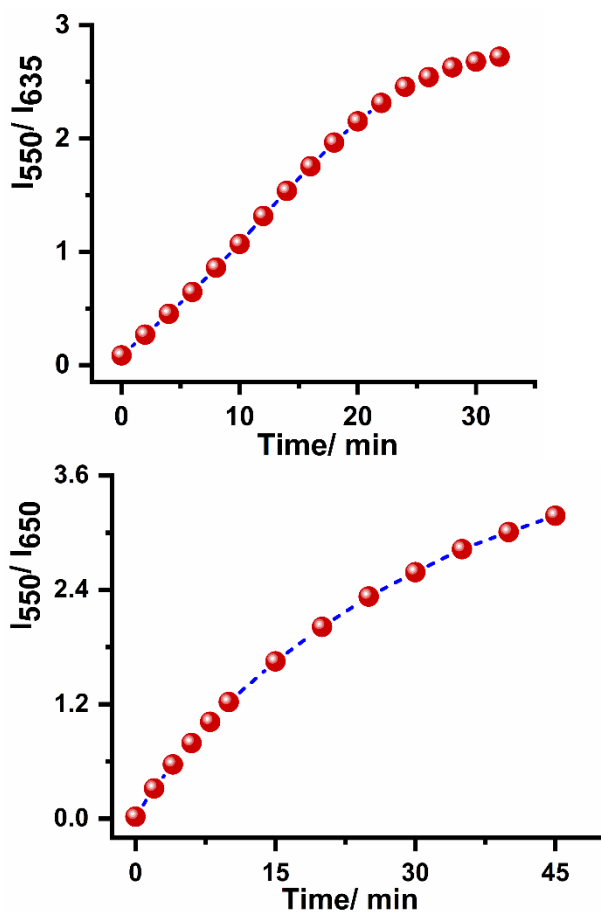

**Fig. S19** Plots representing the change in fluorescence intensity ratio at two wavelengths with time on reaction with  $^1\text{O}_2$  for **1** (left) and **2** (right) in  $\text{CDCl}_3$ .

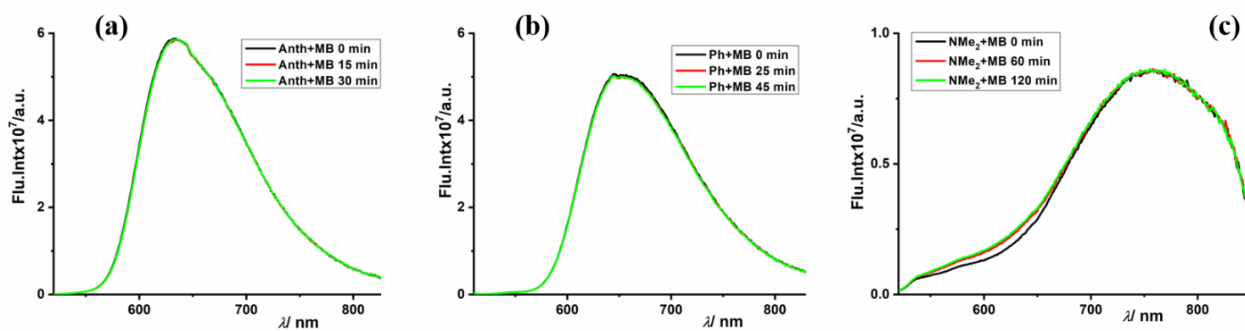

**Fig. S20** Time-dependent emission spectra recorded in dark for (a) **1**, (b) **2** and (c) **3**.  $[\mathbf{1}/\mathbf{2}/\mathbf{3}] = 5 \mu\text{M}$  and MB:  $2 \mu\text{M}$ ].

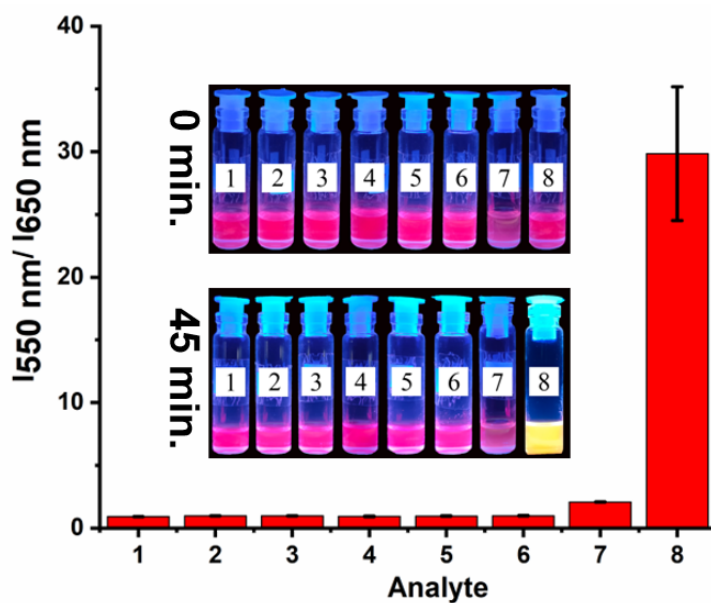

**Fig. S21** Selectivity plot for probe 2 (1: Probe only; 2:  $\text{H}_2\text{O}_2$ ; 3:  $t\text{BuOOH}$ ; 4: Dicumyl peroxide; 5:  $\text{KO}_2$ ; 6:  $\text{NaOCl}$ ; 7: DDQ; 8:  $^1\text{O}_2$ ) [Concentration: 1 ( $5\ \mu\text{M}$ ), 2-7 ( $1\ \text{mM}$ ), 8 ( $5\ \mu\text{M}$  probe and  $2\ \mu\text{M}$  MB)]; Inset pictures showing the color change under UV light on addition of the analyte at 0 min (top) and after 45 min (bottom).

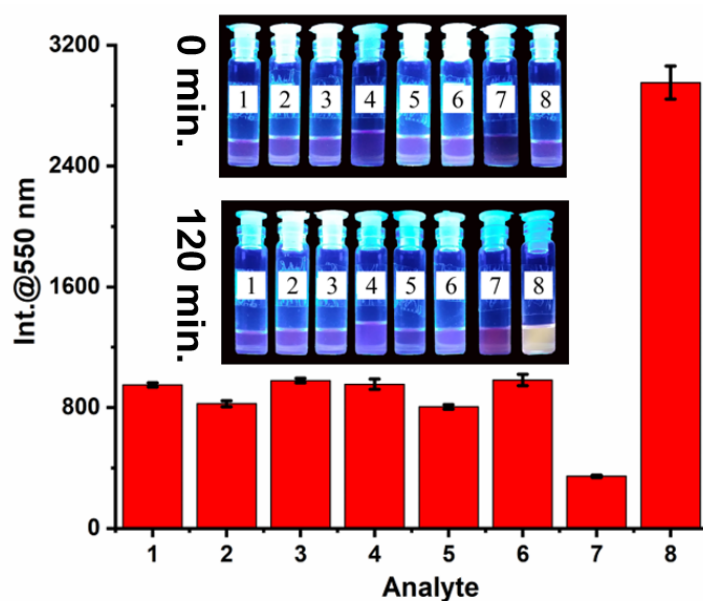

**Fig. S22** Selectivity plot for probe 3 (1: Probe only; 2:  $\text{H}_2\text{O}_2$ ; 3:  $t\text{BuOOH}$ ; 4: Dicumyl peroxide; 5:  $\text{KO}_2$ ; 6:  $\text{NaOCl}$ ; 7: DDQ; 8:  $^1\text{O}_2$ ) [Concentration: 1 ( $5\ \mu\text{M}$ ), 2-7 ( $1\ \text{mM}$ ), 8 ( $5\ \mu\text{M}$  probe and  $2\ \mu\text{M}$  MB)]; Inset pictures showing the color change under UV light on addition of the analyte at 0 min (top) and after 2 h (bottom).



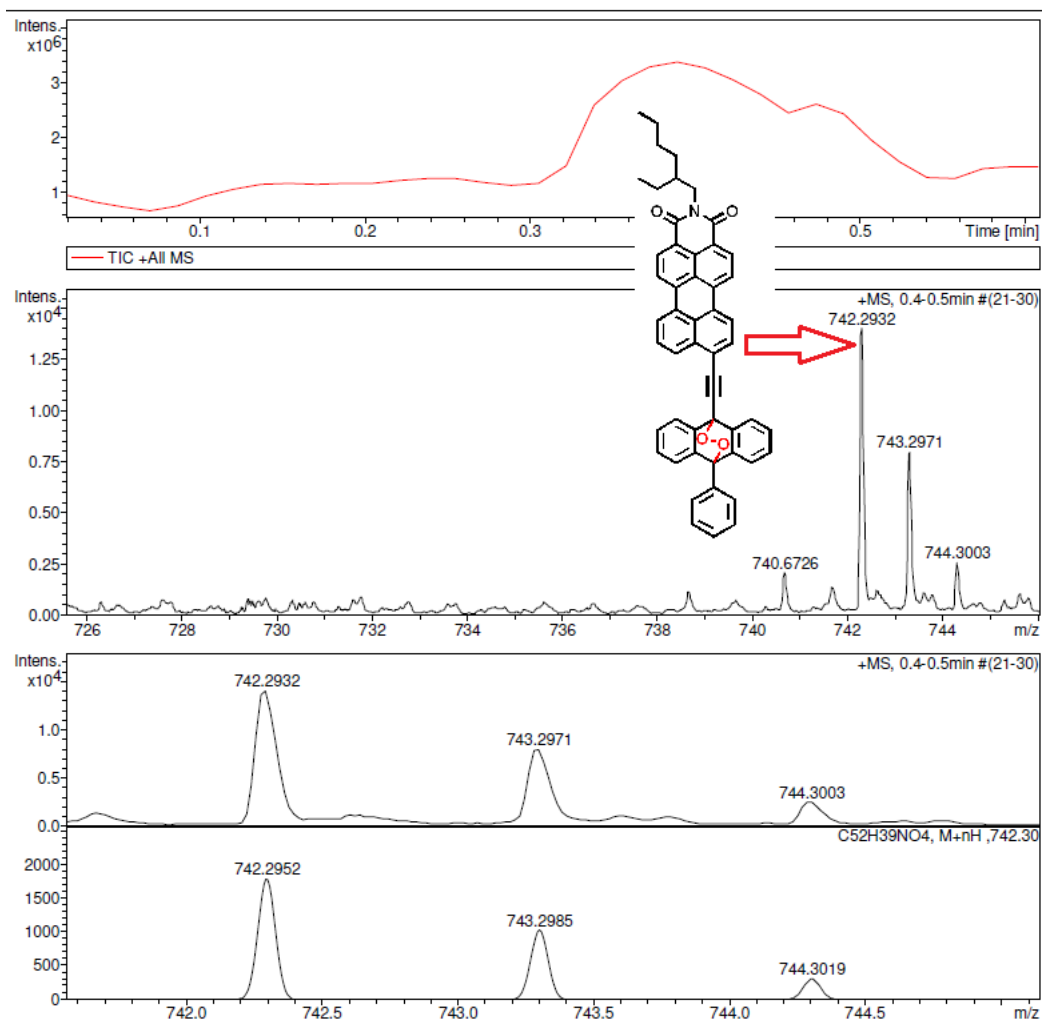

**Fig. S23** APCI mass spectrum for endoperoxide corresponding to **2**. **Calculated mass** – 741.2879 Da and **Obtained mass** –  $m/z$  742.2932 Da  $[M+H]^+$ .

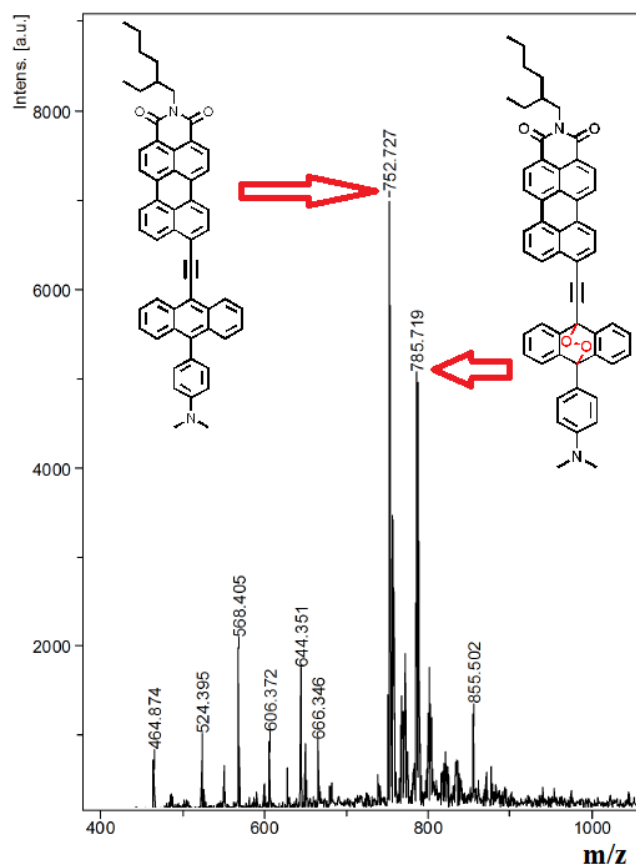

**Fig. S24** MALDI mass spectrum for endoperoxide corresponding to **3**. **Calculated mass** – 784.330 Da and **Obtained mass** –  $m/z$  785.719 Da  $[M+H]^+$  (another peak at  $m/z$  752.727 showing for the unreacted **3** during reaction with  $^1O_2$  because compound **3** reacts slowly to  $^1O_2$ ).

### 3. Density Functional Theory (DFT) Studies

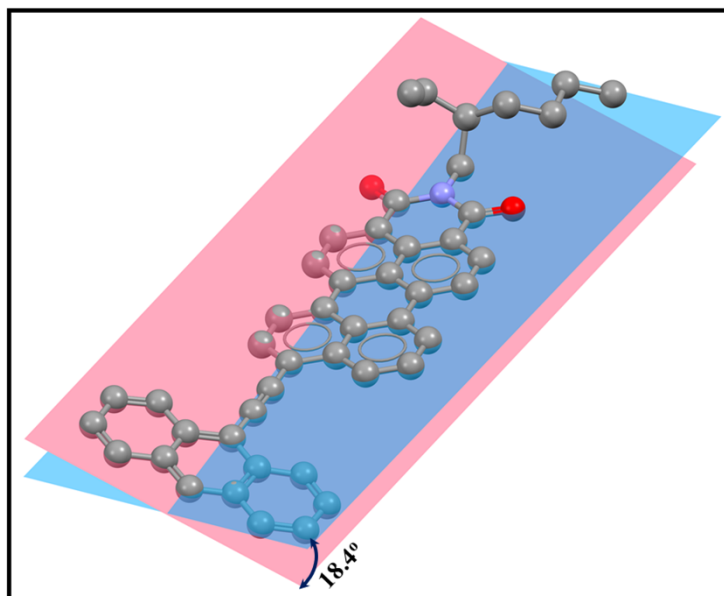

**Fig. S25** Representation of PMI and anthracene planes and their corresponding dihedral angle in optimized geometry of **1**. PMI and anthracene planes are presented by blue and pink color.

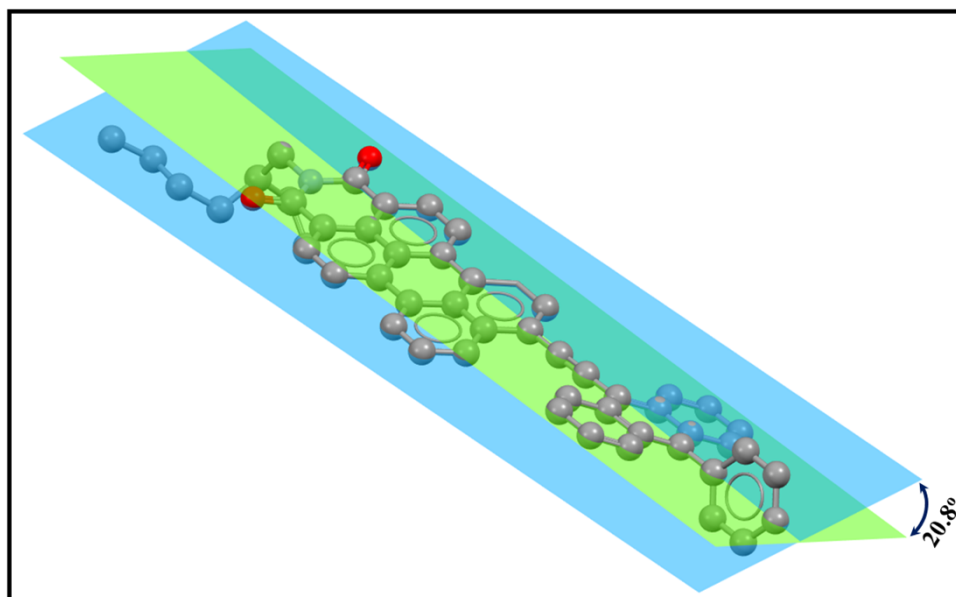

**Fig. S26** Representation of PMI and anthracene planes and their corresponding dihedral angle in optimized geometry of **2**. PMI and anthracene planes are presented by blue and light green color.

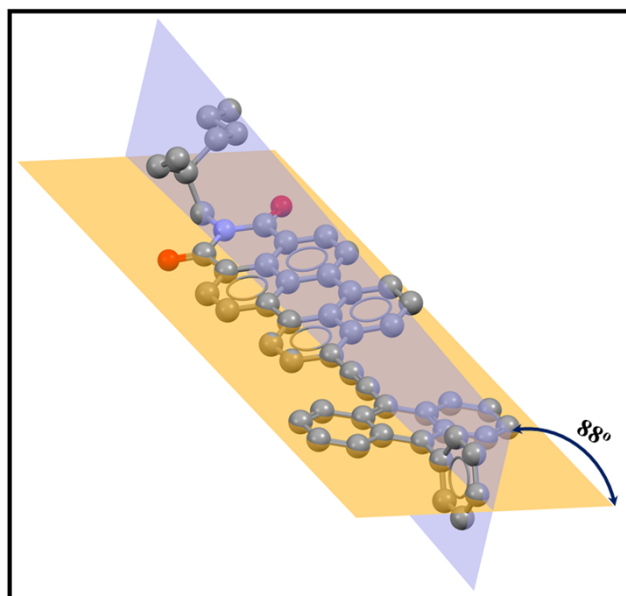

**Fig. S27** Representation of Phenyl and anthracene planes and their corresponding dihedral angle in optimized geometry of **2**. Phenyl and anthracene planes are presented by violet and light orange color.

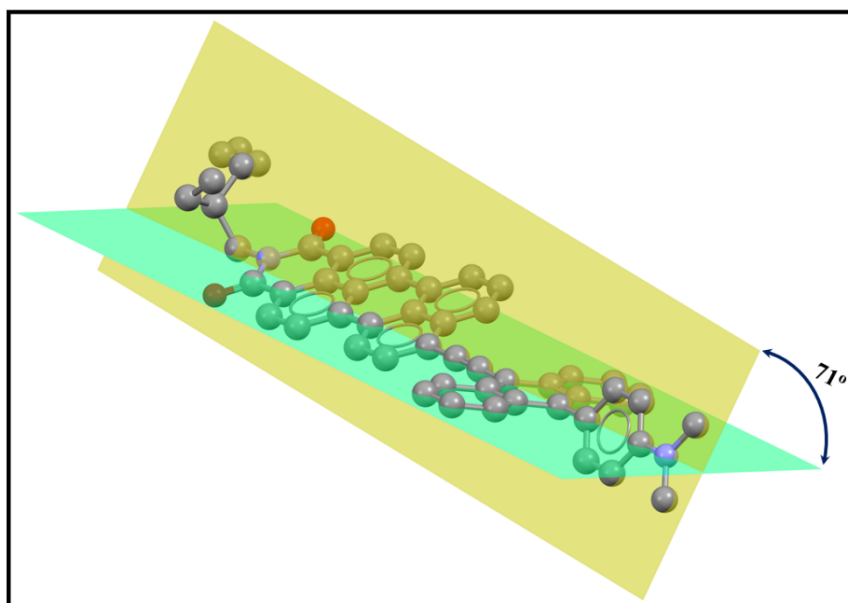

**Fig. S28** Representation of N, N-dimethyl Phenyl and anthracene planes and their corresponding dihedral angle in optimized geometry of **3**. N, N-PhNMe<sub>2</sub> and anthracene planes are presented by yellow and cyan color.

## DFT Calculation Data:

### Symbolic Z-matrix for the optimized configuration of compound 1

Symbolic Z-matrix:

Charge = 0 and Multiplicity = 1

|   |           |          |          |
|---|-----------|----------|----------|
| C | 0.52213   | 2.83395  | 0.32404  |
| C | -0.02312  | 1.5862   | 0.01944  |
| C | 0.85909   | 0.46824  | -0.1608  |
| C | 2.27573   | 0.6663   | -0.02979 |
| C | 2.76994   | 1.95582  | 0.28723  |
| C | 1.90726   | 3.01819  | 0.45978  |
| H | -0.11855  | 3.68991  | 0.46688  |
| C | 0.34713   | -0.83592 | -0.46453 |
| C | 3.17133   | -0.44757 | -0.2145  |
| H | 2.29251   | 3.99825  | 0.70251  |
| C | 2.63261   | -1.70288 | -0.50222 |
| C | 1.25387   | -1.88745 | -0.62245 |
| H | 3.29538   | -2.54462 | -0.64026 |
| H | 0.90216   | -2.88199 | -0.84771 |
| C | -1.10062  | -1.03508 | -0.59783 |
| C | -1.47522  | 1.38948  | -0.11682 |
| C | -1.97996  | 0.08262  | -0.41634 |
| C | -2.38914  | 2.44002  | 0.03535  |
| C | -1.66011  | -2.28452 | -0.89891 |
| C | -3.91299  | -1.39553 | -0.8439  |
| C | -3.39332  | -0.11073 | -0.54393 |
| C | -4.27958  | 0.98266  | -0.37576 |
| C | -3.76479  | 2.24214  | -0.09364 |
| H | -4.44721  | 3.07035  | 0.02708  |
| C | -3.0387   | -2.46189 | -1.02084 |
| H | -3.443    | -3.43592 | -1.25314 |
| C | -5.72889  | 0.79734  | -0.50729 |
| C | -5.35863  | -1.60578 | -0.97317 |
| N | -6.20264  | -0.50591 | -0.73214 |
| O | -6.53611  | 1.75723  | -0.42333 |
| O | -5.84723  | -2.7232  | -1.28055 |
| C | -7.67259  | -0.7104  | -0.88282 |
| H | -8.06228  | 0.19223  | -1.3453  |
| H | -7.78155  | -1.53502 | -1.58132 |
| C | -8.49148  | -1.03544 | 0.3949   |
| H | -9.46998  | -1.31029 | -0.01883 |
| C | -8.72284  | 0.16846  | 1.34065  |
| H | -9.16985  | -0.21335 | 2.26648  |
| H | -7.76187  | 0.60322  | 1.62184  |
| C | -9.63347  | 1.28453  | 0.78922  |
| H | -9.57477  | 2.14094  | 1.47105  |
| H | -9.24498  | 1.6409   | -0.16858 |
| C | -11.11394 | 0.89053  | 0.63549  |
| H | -11.20948 | 0.05254  | -0.06188 |

|   |           |          |          |
|---|-----------|----------|----------|
| H | -11.49051 | 0.53122  | 1.5999   |
| C | -11.99165 | 2.05243  | 0.14453  |
| H | -11.65541 | 2.41246  | -0.83143 |
| H | -13.03639 | 1.74933  | 0.04608  |
| H | -11.95263 | 2.89512  | 0.83994  |
| C | -8.01123  | -2.29574 | 1.16869  |
| H | -7.75636  | -3.07328 | 0.44561  |
| H | -8.86933  | -2.66948 | 1.73763  |
| C | -6.83943  | -2.10856 | 2.14971  |
| H | -5.93595  | -1.74726 | 1.65952  |
| H | -7.08872  | -1.40253 | 2.9438   |
| H | -6.59528  | -3.0615  | 2.6251   |
| H | -1.02689  | -3.14495 | -1.04407 |
| H | -2.04285  | 3.43645  | 0.25776  |
| H | 3.83482   | 2.09468  | 0.40084  |
| C | 4.57837   | -0.29181 | -0.11198 |
| C | 5.79039   | -0.20169 | -0.03272 |
| C | 7.2047    | -0.12573 | 0.07017  |
| C | 7.96204   | -1.31891 | 0.26935  |
| C | 7.86238   | 1.13678  | -0.01908 |
| C | 7.35289   | -2.60925 | 0.36157  |
| C | 9.39867   | -1.23361 | 0.38944  |
| C | 9.29965   | 1.19715  | 0.10859  |
| C | 8.10952   | -3.73954 | 0.55554  |
| H | 6.27835   | -2.68507 | 0.27653  |
| C | 10.1512   | -2.43628 | 0.59157  |
| C | 10.02702  | 0.01646  | 0.30961  |
| C | 9.52759   | -3.65489 | 0.67238  |
| H | 11.22731  | -2.36019 | 0.6794   |
| H | 7.62813   | -4.70576 | 0.62168  |
| H | 10.10528  | -4.55606 | 0.82511  |
| C | 7.15385   | 2.35873  | -0.23951 |
| H | 6.08017   | 2.32407  | -0.35388 |
| C | 9.95134   | 2.47064  | 0.02363  |
| H | 11.02856  | 2.50383  | 0.12342  |
| C | 7.81504   | 3.56047  | -0.31803 |
| H | 7.25849   | 4.47225  | -0.4868  |
| C | 9.23266   | 3.62028  | -0.18196 |
| H | 9.73497   | 4.57569  | -0.24538 |
| H | 11.10465  | 0.07153  | 0.4041   |

**Table S1:** Calculated energy of Kohn-Sham molecular orbitals (MO) of compound **1** by DFT using B3LYP/ 6-311G as basis-set

| Molecular Orbitals (MOs) | Energy/ Hartree | Energy/ eV |
|--------------------------|-----------------|------------|
| LUMO+4                   | -0.04319        | -1.175     |
| LUMO+3                   | -0.05411        | -1.472     |
| LUMO+2                   | -0.05738        | -1.561     |

|        |          |        |
|--------|----------|--------|
| LUMO+1 | -0.08826 | -2.401 |
| LUMO   | -0.12127 | -3.299 |
| HOMO   | -0.20120 | -5.475 |
| HOMO-1 | -0.22059 | -6.002 |
| HOMO-2 | -0.26014 | -7.079 |
| HOMO-3 | -0.26535 | -7.220 |
| HOMO-4 | -0.27118 | -7.379 |

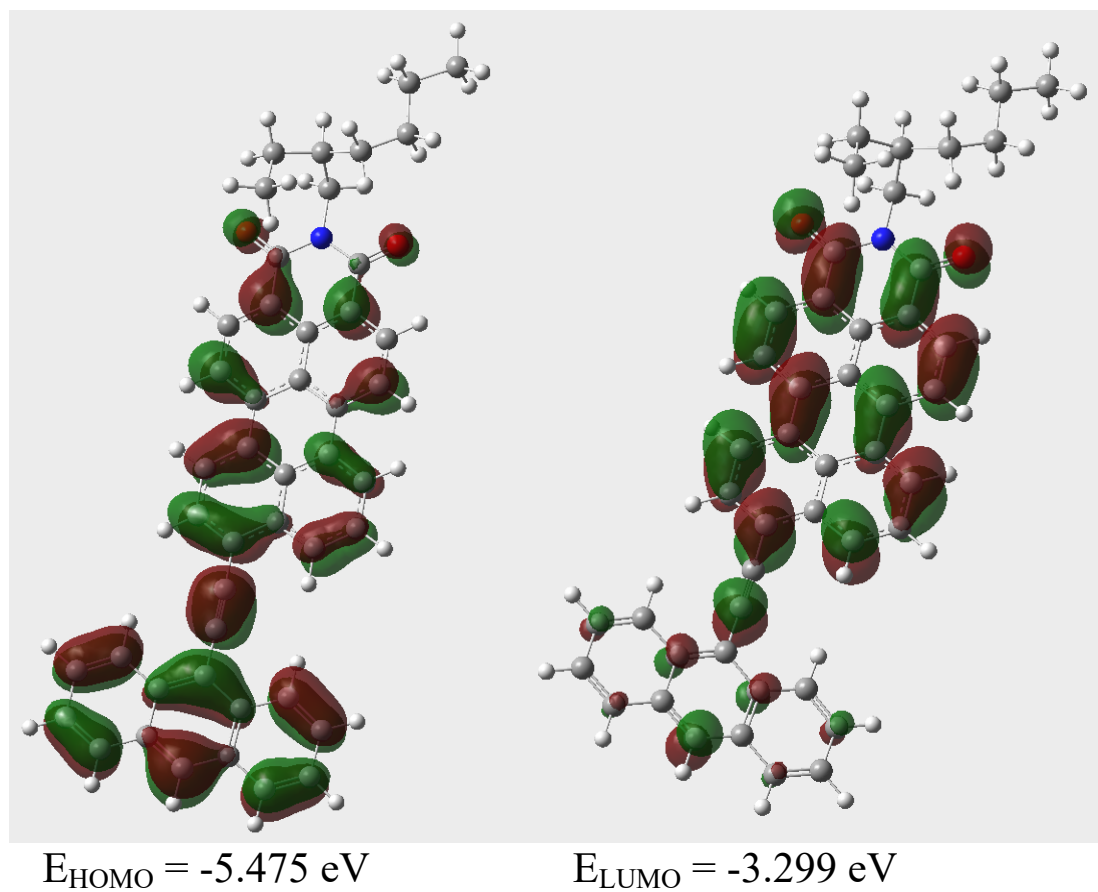

**Fig. S29** Representation of HOMO and LUMO electronic distributions for compound **1**.

## Symbolic Z-matrix for the optimized configuration of compound 2

Symbolic Z-matrix:

Charge =0 and Multiplicity = 1

|   |          |          |          |
|---|----------|----------|----------|
| C | 0.85369  | -2.8128  | 0.30688  |
| C | 1.40909  | -1.57095 | -0.00327 |
| C | 0.53492  | -0.4507  | -0.20699 |
| C | -0.88432 | -0.64044 | -0.09259 |
| C | -1.38907 | -1.92424 | 0.23125  |
| C | -0.53401 | -2.98891 | 0.4261   |
| H | 1.48818  | -3.67031 | 0.46693  |
| C | 1.05739  | 0.84763  | -0.51771 |
| C | -1.77162 | 0.47606  | -0.2999  |
| H | -0.92731 | -3.96448 | 0.67393  |
| C | -1.22284 | 1.72596  | -0.59168 |
| C | 0.15831  | 1.90234  | -0.6964  |
| H | -1.87947 | 2.56967  | -0.74603 |
| H | 0.518    | 2.89291  | -0.92653 |
| C | 2.50769  | 1.03767  | -0.63655 |
| C | 2.86385  | -1.38276 | -0.12216 |
| C | 3.37895  | -0.08219 | -0.43114 |
| C | 3.77045  | -2.43568 | 0.05516  |
| C | 3.07718  | 2.28029  | -0.94673 |
| C | 5.32459  | 1.38056  | -0.85447 |
| C | 4.79473  | 0.10246  | -0.54395 |
| C | 5.67324  | -0.99304 | -0.35083 |
| C | 5.14862  | -2.24617 | -0.05877 |
| H | 5.82526  | -3.07606 | 0.0813   |
| C | 4.45802  | 2.449    | -1.0551  |
| H | 4.87     | 3.41788  | -1.29533 |
| C | 7.125    | -0.81658 | -0.46677 |
| C | 6.77272  | 1.58161  | -0.9704  |
| N | 7.60816  | 0.48105  | -0.70397 |
| O | 7.92617  | -1.77918 | -0.3594  |
| O | 7.27056  | 2.69184  | -1.28865 |
| C | 9.0809   | 0.67573  | -0.83991 |
| H | 9.47109  | -0.2357  | -1.28435 |
| H | 9.20285  | 1.48927  | -1.54917 |
| C | 9.88635  | 1.01559  | 0.44246  |
| H | 10.8721  | 1.2757   | 0.03641  |
| C | 10.09671 | -0.17383 | 1.41113  |
| H | 10.53672 | 0.22008  | 2.33526  |
| H | 9.12901  | -0.59579 | 1.68896  |
| C | 11.00457 | -1.30624 | 0.88929  |
| H | 10.92993 | -2.15117 | 1.58377  |
| H | 10.62539 | -1.67464 | -0.06766 |
| C | 12.4902  | -0.92695 | 0.74865  |
| H | 12.60168 | -0.10073 | 0.03971  |
| H | 12.8574  | -0.5558  | 1.71221  |
| C | 13.36416 | -2.10369 | 0.28719  |



|   |           |          |          |
|---|-----------|----------|----------|
| H | 13.03693  | -2.4764  | -0.68705 |
| H | 14.41255  | -1.81081 | 0.19703  |
| H | 13.30943  | -2.93482 | 0.99533  |
| C | 9.40663   | 2.29258  | 1.18855  |
| H | 9.16888   | 3.05983  | 0.44878  |
| H | 10.26     | 2.66862  | 1.76307  |
| C | 8.21957   | 2.13261  | 2.15572  |
| H | 7.32037   | 1.76888  | 1.65955  |
| H | 8.45168   | 1.43992  | 2.96665  |
| H | 7.97602   | 3.09617  | 2.60955  |
| H | 2.4502    | 3.14203  | -1.1101  |
| H | 3.41638   | -3.42748 | 0.28583  |
| H | -2.45592  | -2.05699 | 0.3326   |
| C | -3.18093  | 0.3281   | -0.2157  |
| C | -4.39433  | 0.24433  | -0.15323 |
| C | -5.81046  | 0.17353  | -0.06952 |
| C | -6.56531  | 1.35999  | 0.15646  |
| C | -6.47471  | -1.07813 | -0.20466 |
| C | -5.93648  | 2.63737  | 0.29312  |
| C | -8.0045   | 1.28424  | 0.25923  |
| C | -7.91399  | -1.14118 | -0.09559 |
| C | -6.67189  | 3.77514  | 0.51392  |
| H | -4.86007  | 2.69399  | 0.21999  |
| C | -8.7321   | 2.49957  | 0.49224  |
| C | -8.66253  | 0.03721  | 0.13639  |
| C | -8.09001  | 3.70523  | 0.61515  |
| H | -9.80765  | 2.44997  | 0.57084  |
| H | -6.17505  | 4.73057  | 0.61324  |
| H | -8.65882  | 4.60809  | 0.79039  |
| C | -5.75551  | -2.28831 | -0.45617 |
| H | -4.68118  | -2.2388  | -0.55579 |
| C | -8.54832  | -2.42168 | -0.23273 |
| H | -9.62336  | -2.47635 | -0.15068 |
| C | -6.40272  | -3.49204 | -0.58284 |
| H | -5.83749  | -4.39386 | -0.77434 |
| C | -7.81974  | -3.55992 | -0.46657 |
| H | -8.3195   | -4.51356 | -0.56739 |
| C | -10.1558  | -0.03601 | 0.25261  |
| C | -10.76401 | -0.27177 | 1.49649  |
| C | -10.97063 | 0.12849  | -0.87957 |
| C | -12.15594 | -0.34144 | 1.60567  |
| H | -10.14614 | -0.4002  | 2.37544  |
| C | -12.36265 | 0.05861  | -0.77008 |
| H | -10.51304 | 0.31025  | -1.84312 |
| C | -12.95863 | -0.1765  | 0.4727   |
| H | -12.61006 | -0.52361 | 2.57051  |
| H | -12.97722 | 0.187    | -1.65105 |
| H | -14.03558 | -0.23044 | 0.55729  |

**Table S2:** Calculated energy of Kohn-Sham molecular orbitals (MO) of compound **2** by DFT using B3LYP/ 6-311G as basis-set

| Molecular Orbitals (MOs) | Energy/ Hartree | Energy/ eV |
|--------------------------|-----------------|------------|
| LUMO+4                   | -0.04323        | -1.176     |
| LUMO+3                   | -0.05415        | -1.473     |
| LUMO+2                   | -0.05766        | -1.569     |
| LUMO+1                   | -0.08895        | -2.420     |
| LUMO                     | -0.12160        | -3.308     |
| HOMO                     | -0.20102        | -5.470     |
| HOMO-1                   | -0.22019        | -5.991     |
| HOMO-2                   | -0.25978        | -7.069     |
| HOMO-3                   | -0.26307        | -7.158     |
| HOMO-4                   | -0.26515        | -7.215     |

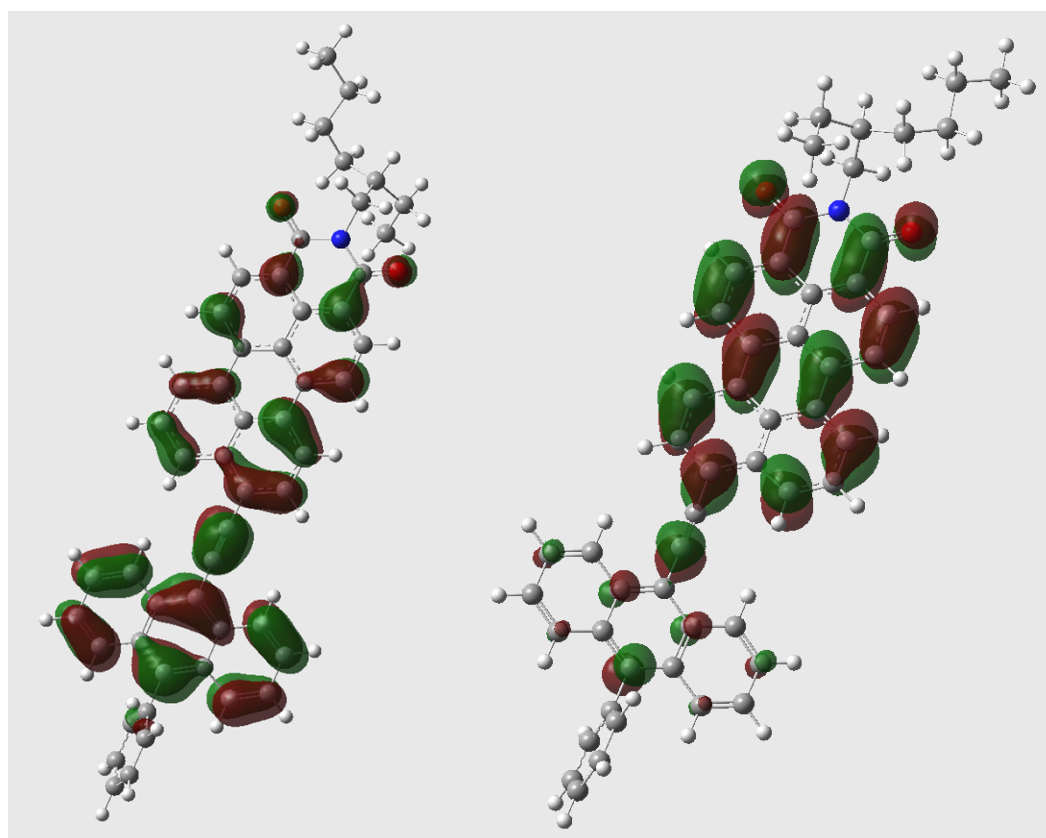

$E_{\text{HOMO}} = -5.470 \text{ eV}$

$E_{\text{LUMO}} = -3.308 \text{ eV}$

**Fig. S30** Representation of HOMO and LUMO electronic distributions for compound **2**.

### Symbolic Z-matrix for the optimized configuration of compound **3**

Symbolic Z-matrix:

Charge =0 Multiplicity = 1

|   |          |          |          |
|---|----------|----------|----------|
| C | 1.74049  | -2.78748 | 0.32416  |
| C | 2.30552  | -1.54976 | 0.0144   |
| C | 1.43979  | -0.42366 | -0.1931  |
| C | 0.01894  | -0.60339 | -0.08264 |
| C | -0.49577 | -1.88325 | 0.2411   |
| C | 0.35132  | -2.95375 | 0.4396   |
| H | 2.36855  | -3.64925 | 0.48678  |
| C | 1.97221  | 0.87064  | -0.50356 |
| C | -0.8603  | 0.51921  | -0.29274 |
| H | -0.04949 | -3.92623 | 0.68762  |
| C | -0.30149 | 1.76615  | -0.57894 |
| C | 1.08102  | 1.93256  | -0.68051 |
| H | -0.95181 | 2.61474  | -0.73342 |
| H | 1.44843  | 2.92096  | -0.90789 |
| C | 3.42353  | 1.04909  | -0.62457 |
| C | 3.76182  | -1.37192 | -0.1008  |
| C | 4.28658  | -0.07641 | -0.41469 |
| C | 4.66081  | -2.43031 | 0.0836   |
| C | 4.00226  | 2.28574  | -0.94221 |
| C | 6.24298  | 1.36958  | -0.84636 |
| C | 5.70376  | 0.09726  | -0.52835 |
| C | 6.5742   | -1.00355 | -0.3289  |
| C | 6.04032  | -2.25121 | -0.0298  |
| H | 6.71092  | -3.08507 | 0.11565  |
| C | 5.3841   | 2.44334  | -1.05268 |
| H | 5.80317  | 3.40758  | -1.29923 |
| C | 8.02713  | -0.83843 | -0.44564 |
| C | 7.69223  | 1.55899  | -0.96499 |
| N | 8.51971  | 0.45397  | -0.6918  |
| O | 8.82136  | -1.80615 | -0.33169 |
| O | 8.19829  | 2.66331  | -1.29115 |
| C | 9.99378  | 0.63683  | -0.82967 |
| H | 10.37711 | -0.28079 | -1.26731 |
| H | 10.12154 | 1.44408  | -1.54506 |
| C | 10.802   | 0.98039  | 0.44998  |
| H | 11.78963 | 1.23011  | 0.04197  |
| C | 11.00357 | -0.20321 | 1.42754  |
| H | 11.44661 | 0.19432  | 2.34868  |
| H | 10.03278 | -0.61596 | 1.70849  |
| C | 11.90312 | -1.34618 | 0.91437  |
| H | 11.82251 | -2.18506 | 1.61549  |
| H | 11.52105 | -1.71932 | -0.03959 |
| C | 13.39146 | -0.97894 | 0.7704   |
| H | 13.50894 | -0.1603  | 0.05368  |
| H | 13.76126 | -0.6014  | 1.73048  |
| C | 14.25691 | -2.16635 | 0.32031  |

|   |           |          |          |
|---|-----------|----------|----------|
| H | 13.92673  | -2.5463  | -0.65013 |
| H | 15.30732  | -1.88184 | 0.22705  |
| H | 14.19647  | -2.99003 | 1.03665  |
| C | 10.33176  | 2.26654  | 1.18632  |
| H | 10.10044  | 3.02998  | 0.44059  |
| H | 11.18772  | 2.64024  | 1.75852  |
| C | 9.14294   | 2.12324  | 2.15383  |
| H | 8.2413    | 1.76246  | 1.66     |
| H | 9.3692    | 1.43526  | 2.9704   |
| H | 8.90647   | 3.0922   | 2.59985  |
| H | 3.38155   | 3.15105  | -1.11059 |
| H | 4.2994    | -3.41828 | 0.31927  |
| H | -1.5639   | -2.00807 | 0.34001  |
| C | -2.27068  | 0.37862  | -0.21944 |
| C | -3.48516  | 0.29774  | -0.17079 |
| C | -4.9019   | 0.2258   | -0.10784 |
| C | -5.65925  | 1.40072  | 0.1645   |
| C | -5.566    | -1.01643 | -0.31291 |
| C | -5.02778  | 2.66709  | 0.37383  |
| C | -7.0994   | 1.32164  | 0.25157  |
| C | -7.00767  | -1.0804  | -0.24156 |
| C | -5.75975  | 3.79136  | 0.66408  |
| H | -3.95113  | 2.72488  | 0.30392  |
| C | -7.82029  | 2.51948  | 0.57802  |
| C | -7.76489  | 0.08505  | 0.04596  |
| C | -7.17624  | 3.71459  | 0.77534  |
| H | -8.89365  | 2.46363  | 0.67375  |
| H | -5.26065  | 4.73842  | 0.8182   |
| H | -7.74261  | 4.60213  | 1.0225   |
| C | -4.84116  | -2.21278 | -0.61119 |
| H | -3.76407  | -2.16097 | -0.67406 |
| C | -7.63849  | -2.34438 | -0.49721 |
| H | -8.71601  | -2.39541 | -0.47212 |
| C | -5.48562  | -3.40435 | -0.83183 |
| H | -4.91585  | -4.29552 | -1.05728 |
| C | -6.90594  | -3.46977 | -0.77851 |
| H | -7.40611  | -4.40932 | -0.96991 |
| C | -9.25491  | 0.01052  | 0.12824  |
| C | -9.89819  | -0.64007 | 1.19543  |
| C | -10.07197 | 0.58519  | -0.86064 |
| C | -11.28591 | -0.71458 | 1.28101  |
| H | -9.30294  | -1.09098 | 1.97948  |
| C | -11.46098 | 0.5146   | -0.79795 |
| H | -9.61353  | 1.09028  | -1.70146 |
| C | -12.11207 | -0.13861 | 0.28087  |
| H | -11.72613 | -1.21829 | 2.12762  |
| H | -12.03838 | 0.96529  | -1.59012 |
| N | -13.49379 | -0.21065 | 0.35417  |
| C | -14.13881 | -0.90016 | 1.47459  |
| H | -15.21596 | -0.85781 | 1.34434  |

|   |           |          |          |
|---|-----------|----------|----------|
| H | -13.84611 | -1.95314 | 1.52633  |
| H | -13.89574 | -0.43391 | 2.43428  |
| C | -14.32136 | 0.40007  | -0.68939 |
| H | -14.13314 | -0.0446  | -1.67144 |
| H | -15.3684  | 0.24619  | -0.44665 |
| H | -14.14754 | 1.47751  | -0.76713 |

**Table S3:** Calculated energy of Kohn-Sham molecular orbitals (MO) of compound **3** by DFT using B3LYP/ 6-311G as basis-set

| Molecular Orbitals (MOs) | Energy/ Hartree | Energy/ eV |
|--------------------------|-----------------|------------|
| LUMO+4                   | -0.04298        | -1.169     |
| LUMO+3                   | -0.05396        | -1.468     |
| LUMO+2                   | -0.05733        | -1.560     |
| LUMO+1                   | -0.08728        | -2.375     |
| LUMO                     | -0.12115        | -3.297     |
| HOMO                     | -0.19249        | -5.238     |
| HOMO-1                   | -0.20326        | -5.531     |
| HOMO-2                   | -0.21945        | -5.971     |
| HOMO-3                   | -0.25787        | -7.017     |
| HOMO-4                   | -0.26141        | -7.113     |

**Table S4:** Summarization of theoretical data obtained from DFT calculations

| Compound | $E_{\text{HOMO}}/ \text{eV}$ | $E_{\text{LUMO}}/ \text{eV}$ | $\Delta E_{\text{HOMO-LUMO}} / \text{eV}$ | $\mu_{\text{g}}/ \text{D}$ | DA (PMI-Anth) | DA (Anth-R) |
|----------|------------------------------|------------------------------|-------------------------------------------|----------------------------|---------------|-------------|
| <b>1</b> | -5.475                       | -3.299                       | 2.176                                     | 11.09                      | 18.4°         | -           |
| <b>2</b> | -5.470                       | -3.308                       | 2.162                                     | 11.44                      | 20.8°         | 88°         |
| <b>3</b> | -5.238                       | -3.297                       | 1.941                                     | 15.64                      | 24.3°         | 71°         |

**DA (PMI-Anth):** dihedral angle between PMI and anthracene planes

**DA (Anth-R):** dihedral angle between anthracene and phenyl (**2**)/ N, N-dimethyl phenyl (**3**)

Symbolic Z-matrix for the optimized configuration of **1-Ep**

Symbolic Z-matrix:

Charge = 0 Multiplicity = 1

|   |          |          |          |
|---|----------|----------|----------|
| C | -0.13464 | -2.80309 | 0.46982  |
| C | 0.41092  | -1.56468 | 0.13267  |
| C | -0.47002 | -0.44716 | -0.05499 |
| C | -1.88425 | -0.63552 | 0.10894  |
| C | -2.38158 | -1.91824 | 0.45356  |
| C | -1.51922 | -2.97944 | 0.62912  |

|   |          |          |          |
|---|----------|----------|----------|
| H | 0.50425  | -3.65945 | 0.61778  |
| C | 0.03939  | 0.84778  | -0.40122 |
| C | -2.77104 | 0.48171  | -0.07457 |
| H | -1.9036  | -3.95467 | 0.89177  |
| C | -2.24069 | 1.7251   | -0.40574 |
| C | -0.86257 | 1.89983  | -0.56647 |
| H | -2.90325 | 2.56721  | -0.54182 |
| H | -0.51173 | 2.88649  | -0.82395 |
| C | 1.48799  | 1.03663  | -0.56859 |
| C | 1.86173  | -1.37644 | -0.03203 |
| C | 2.36526  | -0.07931 | -0.37364 |
| C | 2.77444  | -2.42479 | 0.1327   |
| C | 2.04448  | 2.27421  | -0.9133  |
| C | 4.29475  | 1.38005  | -0.87227 |
| C | 3.77647  | 0.10537  | -0.53035 |
| C | 4.66232  | -0.98618 | -0.34914 |
| C | 4.14922  | -2.23532 | -0.0249  |
| H | 4.83071  | -3.06253 | 0.10687  |
| C | 3.42254  | 2.44403  | -1.06345 |
| H | 3.82557  | 3.41016  | -1.32825 |
| C | 6.11055  | -0.80898 | -0.51011 |
| C | 5.74076  | 1.5826   | -1.02814 |
| N | 6.58491  | 0.48741  | -0.77147 |
| O | 6.91497  | -1.76951 | -0.41867 |
| O | 6.22577  | 2.69034  | -1.37055 |
| C | 8.05382  | 0.68442  | -0.94353 |
| H | 8.43591  | -0.22967 | -1.38948 |
| H | 8.15736  | 1.49233  | -1.66207 |
| C | 8.8865   | 1.03636  | 0.31808  |
| H | 9.86324  | 1.29254  | -0.11146 |
| C | 9.11702  | -0.14411 | 1.29311  |
| H | 9.57405  | 0.25863  | 2.20502  |
| H | 8.15529  | -0.56438 | 1.59348  |
| C | 10.01609 | -1.28032 | 0.76434  |
| H | 9.9557   | -2.11888 | 1.46783  |
| H | 9.61926  | -1.65797 | -0.18182 |
| C | 11.49828 | -0.90084 | 0.59174  |
| H | 11.59511 | -0.08053 | -0.12616 |
| H | 11.88365 | -0.52124 | 1.54484  |
| C | 12.36449 | -2.08058 | 0.12342  |
| H | 12.01943 | -2.4615  | -0.84147 |
| H | 13.4107  | -1.78754 | 0.0112   |
| H | 12.32394 | -2.90597 | 0.83918  |
| C | 8.42273  | 2.32035  | 1.06242  |
| H | 8.16923  | 3.08125  | 0.32126  |
| H | 9.2885   | 2.70127  | 1.61468  |
| C | 7.2574   | 2.16962  | 2.05706  |
| H | 6.34625  | 1.80517  | 1.58382  |
| H | 7.50612  | 1.48149  | 2.86691  |
| H | 7.0265   | 3.1367   | 2.50995  |

|   |           |          |          |
|---|-----------|----------|----------|
| H | 1.41195   | 3.13286  | -1.07097 |
| H | 2.42936   | -3.41366 | 0.38823  |
| H | -3.4459   | -2.05231 | 0.57966  |
| C | -4.17922  | 0.33011  | 0.07615  |
| C | -5.37798  | 0.2159   | 0.20403  |
| C | -6.80614  | 0.07266  | 0.3785   |
| C | -7.63748  | 1.3315   | 0.20172  |
| C | -7.4618   | -1.09856 | -0.33295 |
| C | -7.18166  | 2.57823  | -0.21632 |
| C | -8.9851   | 1.14609  | 0.55728  |
| C | -8.81145  | -1.26456 | 0.02437  |
| C | -8.0895   | 3.64348  | -0.2963  |
| H | -6.14345  | 2.72183  | -0.48143 |
| C | -9.88184  | 2.20959  | 0.49776  |
| C | -9.28041  | -0.24988 | 1.02821  |
| C | -9.42953  | 3.46129  | 0.05791  |
| H | -10.91596 | 2.0693   | 0.78272  |
| C | -6.85173  | -1.98103 | -1.21966 |
| H | -5.81188  | -1.85692 | -1.488   |
| C | -9.55565  | -2.31626 | -0.50336 |
| H | -10.59094 | -2.4495  | -0.21932 |
| C | -7.60699  | -3.02806 | -1.76639 |
| H | -7.14559  | -3.71064 | -2.4665  |
| C | -8.94882  | -3.19494 | -1.41155 |
| H | -9.52224  | -4.00648 | -1.83768 |
| O | -6.94509  | -0.27235 | 1.90267  |
| O | -8.42291  | -0.46417 | 2.26973  |
| H | -7.74783  | 4.61247  | -0.63292 |
| H | -10.12124 | 4.28988  | -0.00522 |
| H | -10.29179 | -0.40386 | 1.39443  |

**Table S5:** Calculated energy of Kohn-Sham molecular orbitals (MO) of **1-Ep** by DFT using B3LYP/ 6-311G as basis-set

| Molecular Orbitals (MOs) | Energy/ Hartree | Energy/ eV |
|--------------------------|-----------------|------------|
| LUMO+4                   | -0.04510        | -1.227     |
| LUMO+3                   | -0.05405        | -1.470     |
| LUMO+2                   | -0.05553        | -1.511     |
| LUMO+1                   | -0.07457        | -2.029     |
| LUMO                     | -0.12316        | -3.351     |
| HOMO                     | -0.21578        | -5.871     |
| HOMO-1                   | -0.25491        | -6.936     |
| HOMO-2                   | -0.25546        | -6.951     |
| HOMO-3                   | -0.26974        | -7.340     |
| HOMO-4                   | -0.27268        | -7.420     |

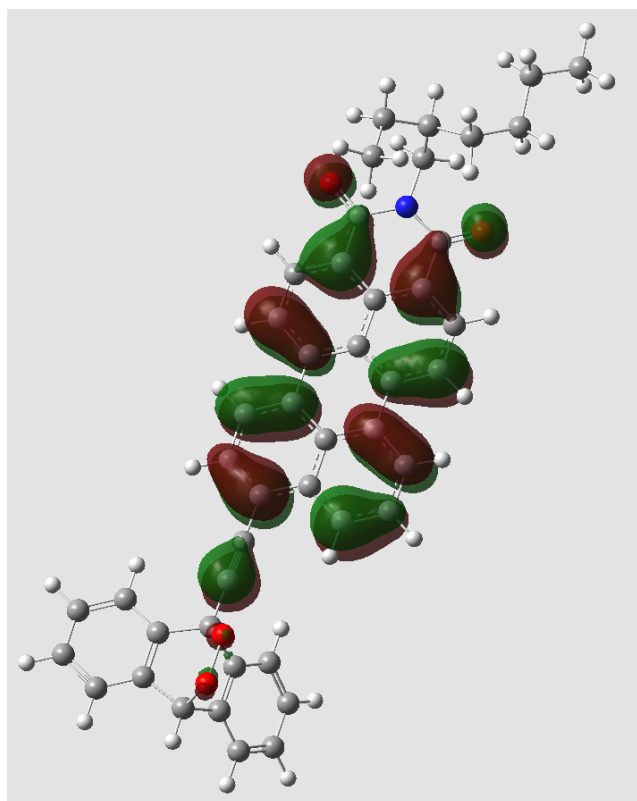

$$E_{\text{HOMO}} = -5.871 \text{ eV}$$

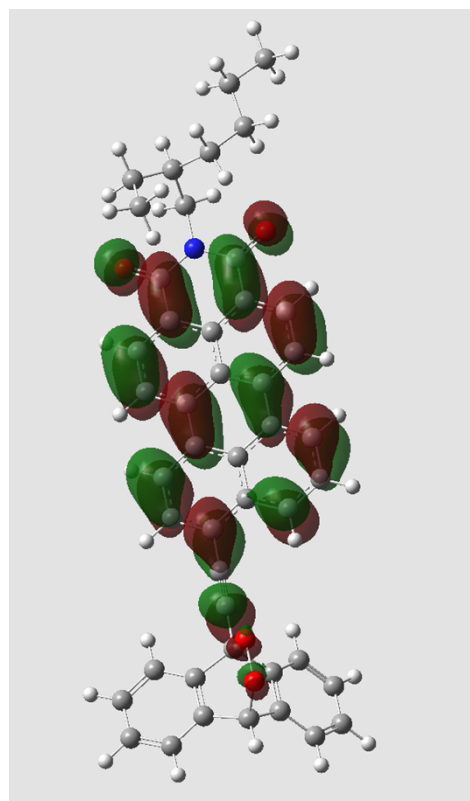

$$E_{\text{LUMO}} = -3.351 \text{ eV}$$

**Fig. S31** Representation of HOMO and LUMO electronic distributions for compound **1-EP**.

### Symbolic Z-matrix for the optimized configuration of **2-Ep**

Symbolic Z-matrix:

Charge =0 and Multiplicity = 1

|   |          |          |          |
|---|----------|----------|----------|
| C | 1.03441  | -2.73487 | 0.29471  |
| C | 1.61827  | -1.50023 | 0.01241  |
| C | 0.76855  | -0.35974 | -0.18106 |
| C | -0.65452 | -0.52185 | -0.07812 |
| C | -1.1916  | -1.80215 | 0.21155  |
| C | -0.35882 | -2.88567 | 0.39346  |
| H | 1.6492   | -3.60834 | 0.44495  |
| C | 1.31758  | 0.93211  | -0.47403 |
| C | -1.51007 | 0.61869  | -0.26625 |
| H | -0.77336 | -3.8589  | 0.61425  |
| C | -0.94178 | 1.85953  | -0.53816 |
| C | 0.44496  | 2.0083   | -0.64122 |
| H | -1.58092 | 2.71939  | -0.6754  |
| H | 0.82603  | 2.99389  | -0.85634 |
| C | 2.77468  | 1.09191  | -0.58892 |
| C | 3.07795  | -1.33926 | -0.09106 |
| C | 3.62063  | -0.04695 | -0.388   |
| C | 3.96208  | -2.40956 | 0.08781  |
| C | 3.36881  | 2.323    | -0.8912  |
| C | 5.59638  | 1.37761  | -0.79744 |
| C | 5.03993  | 0.10931  | -0.49428 |



|   |          |          |          |
|---|----------|----------|----------|
| C | 5.89572  | -1.00417 | -0.30212 |
| C | 5.34528  | -2.24699 | -0.01716 |
| H | 6.00413  | -3.09086 | 0.12377  |
| C | 4.75424  | 2.46432  | -0.99552 |
| H | 5.18654  | 3.42548  | -1.23051 |
| C | 7.35199  | -0.85638 | -0.41231 |
| C | 7.05029  | 1.54912  | -0.91032 |
| N | 7.86225  | 0.43156  | -0.64625 |
| O | 8.13241  | -1.83487 | -0.30375 |
| O | 7.5693   | 2.64988  | -1.22437 |
| C | 9.33905  | 0.59613  | -0.78142 |
| H | 9.71041  | -0.32265 | -1.22679 |
| H | 9.47772  | 1.40761  | -1.48994 |
| C | 10.15057 | 0.91786  | 0.50175  |
| H | 11.13983 | 1.16482  | 0.09612  |
| C | 10.34359 | -0.27953 | 1.46416  |
| H | 10.79165 | 0.10272  | 2.3893   |
| H | 9.36988  | -0.68756 | 1.74184  |
| C | 11.23226 | -1.4236  | 0.93474  |
| H | 11.14623 | -2.27032 | 1.62566  |
| H | 10.84485 | -1.78172 | -0.02287 |
| C | 12.72329 | -1.06729 | 0.79116  |
| H | 12.84598 | -0.2419  | 0.08314  |
| H | 13.09846 | -0.70339 | 1.7544   |
| C | 13.57776 | -2.25684 | 0.32609  |
| H | 13.24226 | -2.62363 | -0.6476  |
| H | 14.63024 | -1.97992 | 0.23331  |
| H | 13.51229 | -3.0877  | 1.03363  |
| C | 9.691    | 2.19836  | 1.25453  |
| H | 9.46485  | 2.97309  | 0.51892  |
| H | 10.55051 | 2.55819  | 1.83019  |
| C | 8.50248  | 2.05189  | 2.22201  |
| H | 7.59737  | 1.70349  | 1.72551  |
| H | 8.72502  | 1.35248  | 3.02981  |
| H | 8.27365  | 3.01702  | 2.68007  |
| H | 2.76043  | 3.19826  | -1.0526  |
| H | 3.58743  | -3.39511 | 0.31253  |
| H | -2.26273 | -1.91664 | 0.29097  |
| C | -2.92624 | 0.48966  | -0.18538 |
| C | -4.13126 | 0.38882  | -0.12376 |
| C | -5.56854 | 0.2501   | -0.03917 |
| C | -6.37503 | 1.52913  | -0.09209 |
| C | -6.19559 | -0.81238 | -0.9159  |
| C | -5.86363 | 2.80572  | -0.30892 |
| C | -7.74289 | 1.33458  | 0.17251  |
| C | -7.56311 | -1.01326 | -0.6558  |
| C | -6.72925 | 3.90563  | -0.27449 |
| H | -4.80904 | 2.94385  | -0.50202 |
| C | -8.59467 | 2.43698  | 0.23672  |
| C | -8.11285 | -0.11787 | 0.44738  |

|   |           |          |          |
|---|-----------|----------|----------|
| C | -8.08608  | 3.72106  | 0.00094  |
| H | -9.64156  | 2.30663  | 0.46514  |
| C | -5.52643  | -1.58643 | -1.86015 |
| H | -4.47364  | -1.42731 | -2.04635 |
| C | -8.25378  | -2.01397 | -1.33886 |
| H | -9.29713  | -2.19716 | -1.13157 |
| C | -6.23228  | -2.56883 | -2.5652  |
| H | -5.72381  | -3.16496 | -3.3101  |
| C | -7.58725  | -2.78258 | -2.30217 |
| H | -8.1283   | -3.54786 | -2.84127 |
| C | -9.55478  | -0.36963 | 0.84712  |
| C | -9.89357  | -0.84498 | 2.12156  |
| C | -10.57892 | -0.12147 | -0.08323 |
| C | -11.23265 | -1.06829 | 2.45842  |
| H | -9.11803  | -1.03952 | 2.84559  |
| C | -11.91463 | -0.34549 | 0.25711  |
| H | -10.33679 | 0.24571  | -1.07124 |
| C | -12.24614 | -0.82012 | 1.53015  |
| H | -11.47888 | -1.43534 | 3.44557  |
| H | -12.6911  | -0.14974 | -0.46974 |
| H | -13.28067 | -0.99341 | 1.79329  |
| O | -5.78738  | -0.27853 | 1.41837  |
| O | -7.27345  | -0.49121 | 1.68514  |
| H | -6.34274  | 4.89889  | -0.45563 |
| H | -8.75107  | 4.57279  | 0.03706  |

**Table S6:** Calculated energy of Kohn-Sham molecular orbitals (MO) of **2-Ep** by DFT using B3LYP/ 6-311G as basis-set

| Molecular Orbitals (MOs) | Energy/ Hartree | Energy/ eV |
|--------------------------|-----------------|------------|
| LUMO+4                   | -0.04511        | -1.227     |
| LUMO+3                   | -0.05466        | -1.487     |
| LUMO+2                   | -0.05557        | -1.512     |
| LUMO+1                   | -0.07405        | -2.015     |
| LUMO                     | -0.12308        | -3.349     |
| HOMO                     | -0.21578        | -5.871     |
| HOMO-1                   | -0.25604        | -6.967     |
| HOMO-2                   | -0.25687        | -6.989     |
| HOMO-3                   | -0.26620        | -7.243     |
| HOMO-4                   | -0.26732        | -7.274     |

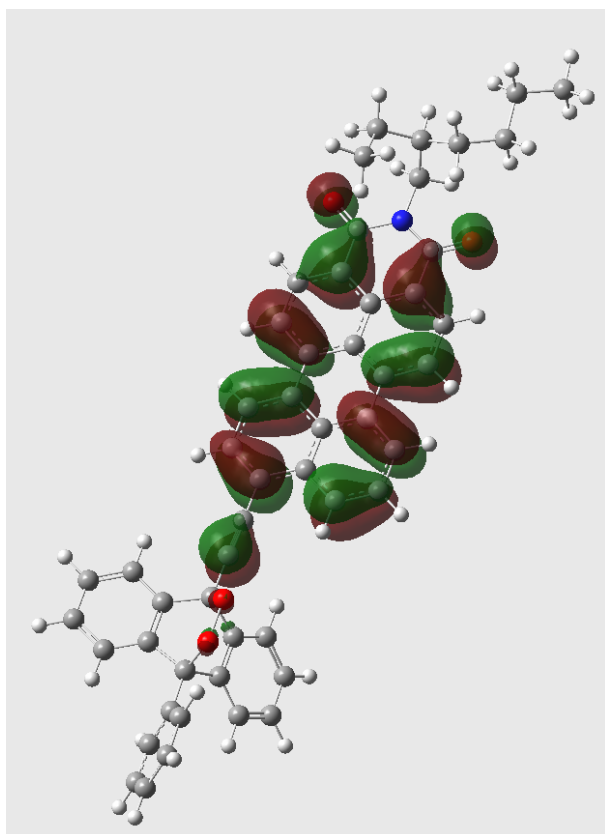

$$E_{\text{HOMO}} = -5.871 \text{ eV}$$

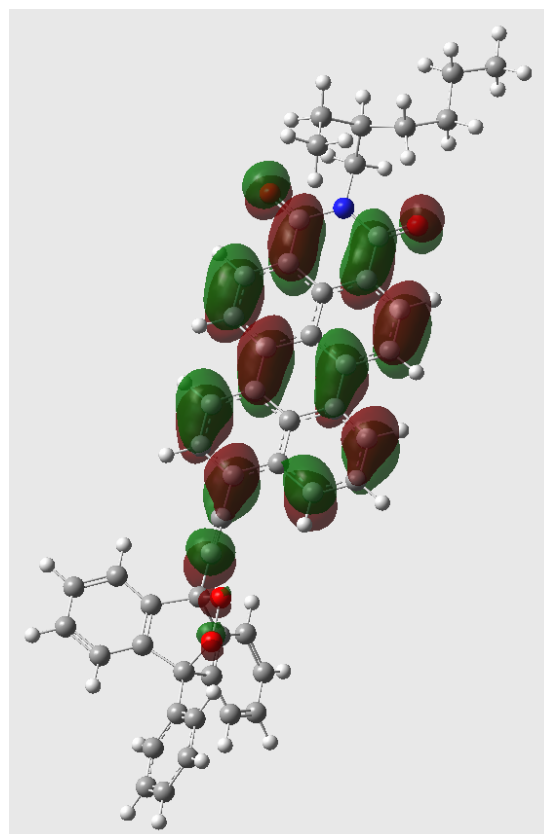

$$E_{\text{LUMO}} = -3.349 \text{ eV}$$

**Fig. S32** Representation of HOMO and LUMO electronic distributions for compound **2-EP**.

### Symbolic Z-matrix for the optimized configuration of **3-Ep**

Symbolic Z-matrix:

Charge = 0 and Multiplicity = 1

|   |          |          |          |
|---|----------|----------|----------|
| C | 1.74049  | -2.78748 | 0.32416  |
| C | 2.30552  | -1.54976 | 0.0144   |
| C | 1.43979  | -0.42366 | -0.1931  |
| C | 0.01894  | -0.60339 | -0.08264 |
| C | -0.49577 | -1.88325 | 0.2411   |
| C | 0.35132  | -2.95375 | 0.4396   |
| H | 2.36855  | -3.64925 | 0.48678  |
| C | 1.97221  | 0.87064  | -0.50356 |
| C | -0.8603  | 0.51921  | -0.29274 |
| H | -0.04949 | -3.92623 | 0.68762  |
| C | -0.30149 | 1.76615  | -0.57894 |
| C | 1.08102  | 1.93256  | -0.68051 |
| H | -0.95181 | 2.61474  | -0.73342 |
| H | 1.44843  | 2.92096  | -0.90789 |
| C | 3.42353  | 1.04909  | -0.62457 |
| C | 3.76182  | -1.37192 | -0.1008  |
| C | 4.28658  | -0.07641 | -0.41469 |
| C | 4.66081  | -2.43031 | 0.0836   |
| C | 4.00226  | 2.28574  | -0.94221 |

|   |          |          |          |
|---|----------|----------|----------|
| C | 6.24298  | 1.36958  | -0.84636 |
| C | 5.70376  | 0.09726  | -0.52835 |
| C | 6.5742   | -1.00355 | -0.3289  |
| C | 6.04032  | -2.25121 | -0.0298  |
| H | 6.71092  | -3.08507 | 0.11565  |
| C | 5.3841   | 2.44334  | -1.05268 |
| H | 5.80317  | 3.40758  | -1.29923 |
| C | 8.02713  | -0.83843 | -0.44564 |
| C | 7.69223  | 1.55899  | -0.96499 |
| N | 8.51971  | 0.45397  | -0.6918  |
| O | 8.82136  | -1.80615 | -0.33169 |
| O | 8.19829  | 2.66331  | -1.29115 |
| C | 9.99378  | 0.63683  | -0.82967 |
| H | 10.37711 | -0.28079 | -1.26731 |
| H | 10.12154 | 1.44408  | -1.54506 |
| C | 10.802   | 0.98039  | 0.44998  |
| H | 11.78963 | 1.23011  | 0.04197  |
| C | 11.00357 | -0.20321 | 1.42754  |
| H | 11.44661 | 0.19432  | 2.34868  |
| H | 10.03278 | -0.61596 | 1.70849  |
| C | 11.90312 | -1.34618 | 0.91437  |
| H | 11.82251 | -2.18506 | 1.61549  |
| H | 11.52105 | -1.71932 | -0.03959 |
| C | 13.39146 | -0.97894 | 0.7704   |
| H | 13.50894 | -0.1603  | 0.05368  |
| H | 13.76126 | -0.6014  | 1.73048  |
| C | 14.25691 | -2.16635 | 0.32031  |
| H | 13.92673 | -2.5463  | -0.65013 |
| H | 15.30732 | -1.88184 | 0.22705  |
| H | 14.19647 | -2.99003 | 1.03665  |
| C | 10.33176 | 2.26654  | 1.18632  |
| H | 10.10044 | 3.02998  | 0.44059  |
| H | 11.18772 | 2.64024  | 1.75852  |
| C | 9.14294  | 2.12324  | 2.15383  |
| H | 8.2413   | 1.76246  | 1.66     |
| H | 9.3692   | 1.43526  | 2.9704   |
| H | 8.90647  | 3.0922   | 2.59985  |
| H | 3.38155  | 3.15105  | -1.11059 |
| H | 4.2994   | -3.41828 | 0.31927  |
| H | -1.5639  | -2.00807 | 0.34001  |
| C | -2.27068 | 0.37862  | -0.21944 |
| C | -3.48516 | 0.29774  | -0.17079 |
| C | -4.9019  | 0.2258   | -0.10784 |
| C | -5.65925 | 1.40072  | 0.1645   |
| C | -5.566   | -1.01643 | -0.31291 |
| C | -5.02778 | 2.66709  | 0.37383  |
| C | -7.0994  | 1.32164  | 0.25157  |
| C | -7.00767 | -1.0804  | -0.24156 |
| C | -5.75975 | 3.79136  | 0.66408  |
| H | -3.95113 | 2.72488  | 0.30392  |

|   |           |          |          |
|---|-----------|----------|----------|
| C | -7.82029  | 2.51948  | 0.57802  |
| C | -7.76489  | 0.08505  | 0.04596  |
| C | -7.17624  | 3.71459  | 0.77534  |
| H | -8.89365  | 2.46363  | 0.67375  |
| H | -5.26065  | 4.73842  | 0.8182   |
| H | -7.74261  | 4.60213  | 1.0225   |
| C | -4.84116  | -2.21278 | -0.61119 |
| H | -3.76407  | -2.16097 | -0.67406 |
| C | -7.63849  | -2.34438 | -0.49721 |
| H | -8.71601  | -2.39541 | -0.47212 |
| C | -5.48562  | -3.40435 | -0.83183 |
| H | -4.91585  | -4.29552 | -1.05728 |
| C | -6.90594  | -3.46977 | -0.77851 |
| H | -7.40611  | -4.40932 | -0.96991 |
| C | -9.25491  | 0.01052  | 0.12824  |
| C | -9.89819  | -0.64007 | 1.19543  |
| C | -10.07197 | 0.58519  | -0.86064 |
| C | -11.28591 | -0.71458 | 1.28101  |
| H | -9.30294  | -1.09098 | 1.97948  |
| C | -11.46098 | 0.5146   | -0.79795 |
| H | -9.61353  | 1.09028  | -1.70146 |
| C | -12.11207 | -0.13861 | 0.28087  |
| H | -11.72613 | -1.21829 | 2.12762  |
| H | -12.03838 | 0.96529  | -1.59012 |
| N | -13.49379 | -0.21065 | 0.35417  |
| C | -14.13881 | -0.90016 | 1.47459  |
| H | -15.21596 | -0.85781 | 1.34434  |
| H | -13.84611 | -1.95314 | 1.52633  |
| H | -13.89574 | -0.43391 | 2.43428  |
| C | -14.32136 | 0.40007  | -0.68939 |
| H | -14.13314 | -0.0446  | -1.67144 |
| H | -15.3684  | 0.24619  | -0.44665 |
| H | -14.14754 | 1.47751  | -0.76713 |

**Table S7:** Calculated energy of Kohn-Sham molecular orbitals (MO) of **3-Ep** by DFT using B3LYP/ 6-311G as basis-set

| Molecular Orbitals (MOs) | Energy/ Hartree | Energy/ eV |
|--------------------------|-----------------|------------|
| LUMO+4                   | -0.04485        | -1.220     |
| LUMO+3                   | -0.05510        | -1.499     |
| LUMO+2                   | -0.05775        | -1.571     |
| LUMO+1                   | -0.07034        | -1.914     |
| LUMO                     | -0.12215        | -3.324     |
| HOMO                     | -0.19772        | -5.380     |
| HOMO-1                   | -0.21513        | -5.854     |
| HOMO-2                   | -0.25469        | -6.930     |
| HOMO-3                   | -0.25547        | -6.951     |
| HOMO-4                   | -0.26201        | -7.129     |

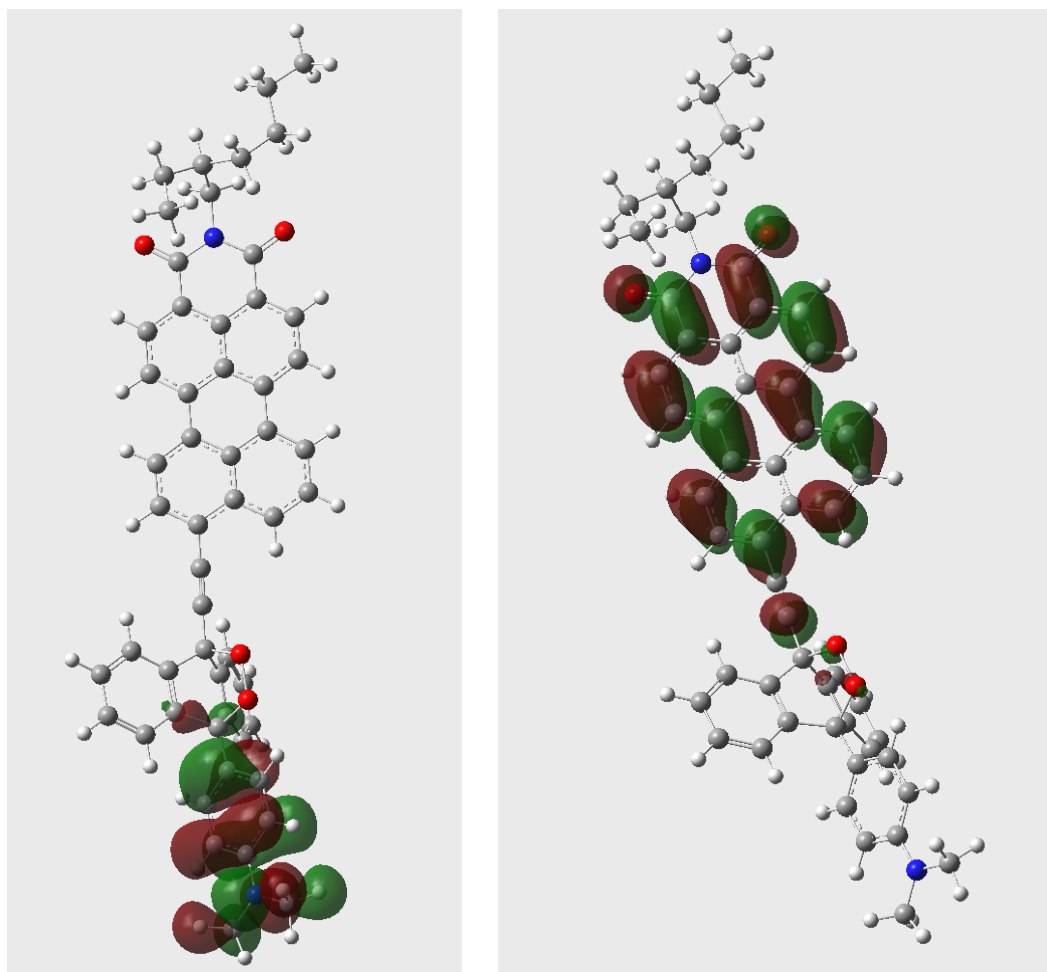

$$E_{\text{HOMO}} = -5.380 \text{ eV}$$

$$E_{\text{LUMO}} = -3.324 \text{ eV}$$

**Fig. S33** Representation of HOMO and LUMO electronic distributions for compound 3-EP.

**Table S8:** Thermodynamic feasibility of  $^1\text{O}_2$  reaction for compounds 1-3

| Compound | $E_{\text{Comp}}/ \text{eV}$ | $E_{\text{EP}}/ \text{eV}$ | $E_{\text{EP}} - E_{\text{Comp}}/ \text{eV}$ | $\Delta E^a/ \text{eV}$ |
|----------|------------------------------|----------------------------|----------------------------------------------|-------------------------|
| 1        | -53856.8745                  | -57947.1918                | -4090.3173                                   | -2.201                  |
| 2        | -60143.9423                  | -64234.2161                | -4090.2738                                   | -2.158                  |
| 3        | -63789.1956                  | -67879.4776                | -4090.282                                    | -2.166                  |

$\Delta E^a$  is calculated by following this equation:  $\Delta E^a = E_{\text{EP}} - E_{\text{Comp}} - E(^1\text{O}_2)$ ;  $E(^1\text{O}_2) = -4088.1158 \text{ eV}$

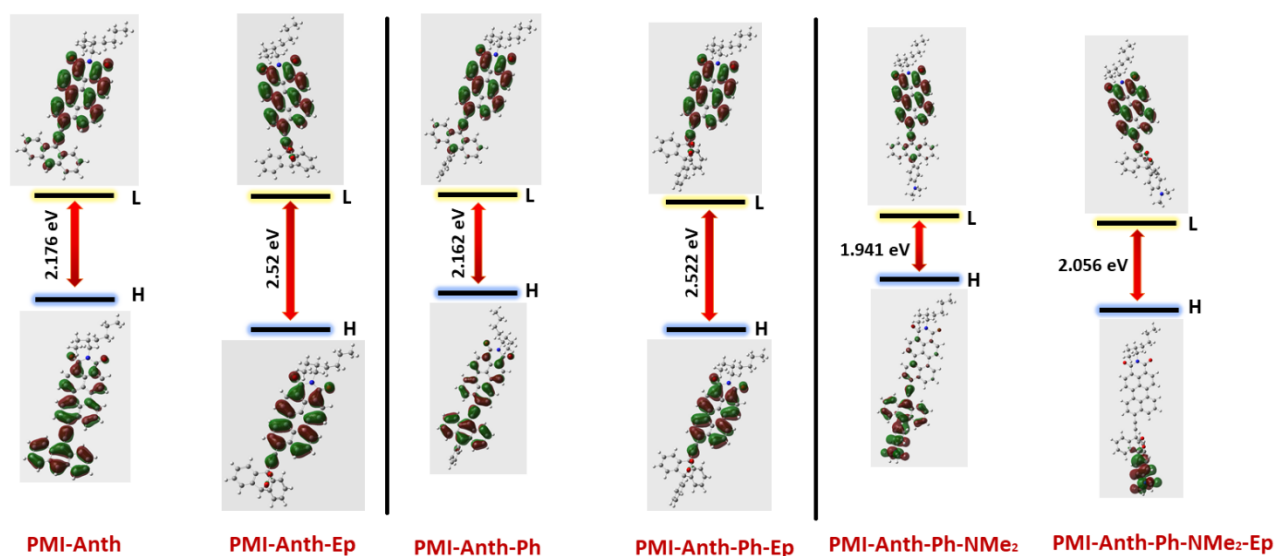

Fig. S34 Orbital picture and the band gap of compound 1-3 and their corresponding endoperoxides.

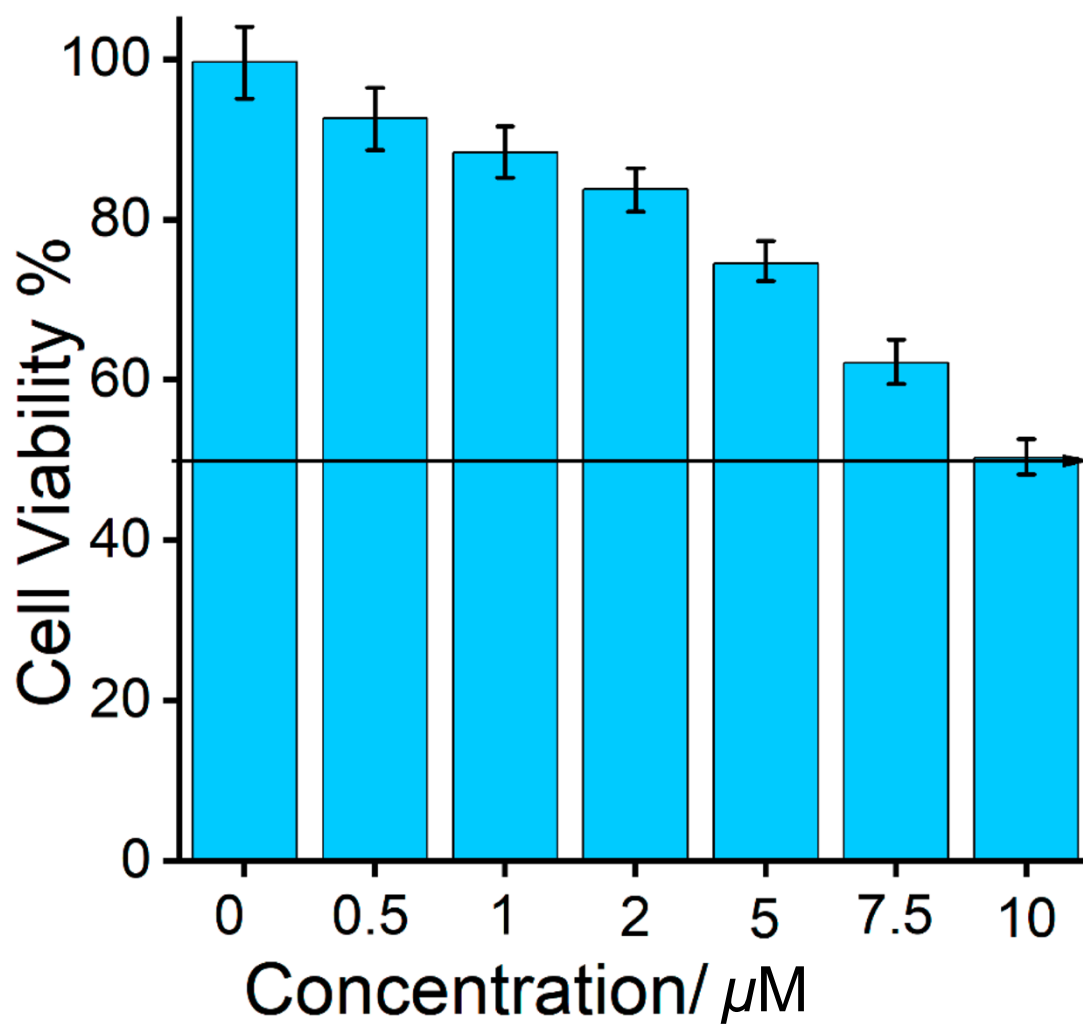

Fig. S35 MTT assay showing cell viability in the presence of compound 2 (0–10  $\mu\text{M}$ ).

### Spectral scanning experiment:

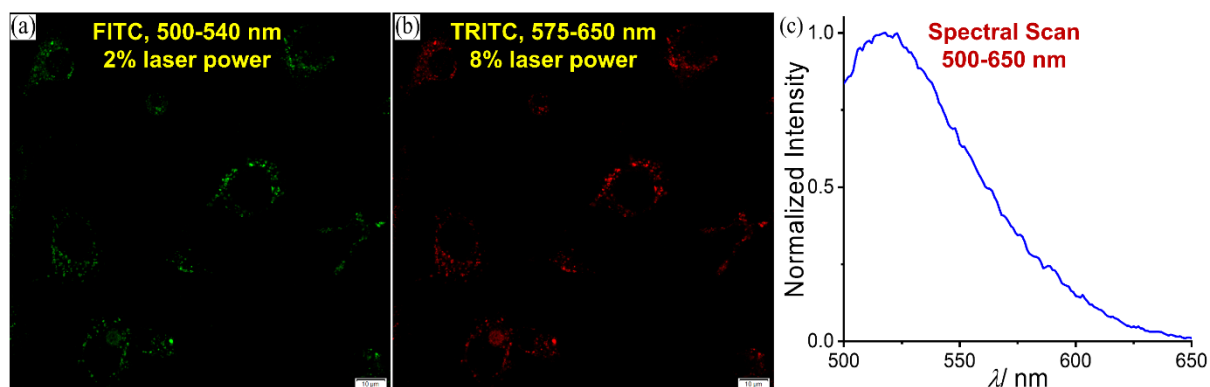

**Fig. S36** CLSM images of live HepG2 cells stained with  $2 \mu\text{M}$  **2** in (a) FITC, and (b) TRITC channel; (c) spectral scanning performed in lambda mode in the live cells shows the emission profile of the compound **2**.

**Note:** The probe of interest has emissions both in the green and red channels. Hence, we have performed a spectral scanning experiment in live cells stained with compound **2**. It is evident from the intensity profile in **Fig S36** that the probe gives maximum emission in the green channel. This fact could be supported by the laser power required to image the individual channels 2% for the green channel while 8% for the red channel, suggesting a much weaker red emission of the probe inside cells. Now, the colocalization experiment was performed using the commercially available tracker LipidSpot 610 which was excited by a 594 nm laser with only 0.5% laser power in a sequential scanning mode. The low laser power was only enough to excite LipidSpot 610 while the sequential scanning ensured zero crosstalk between imaging channels.



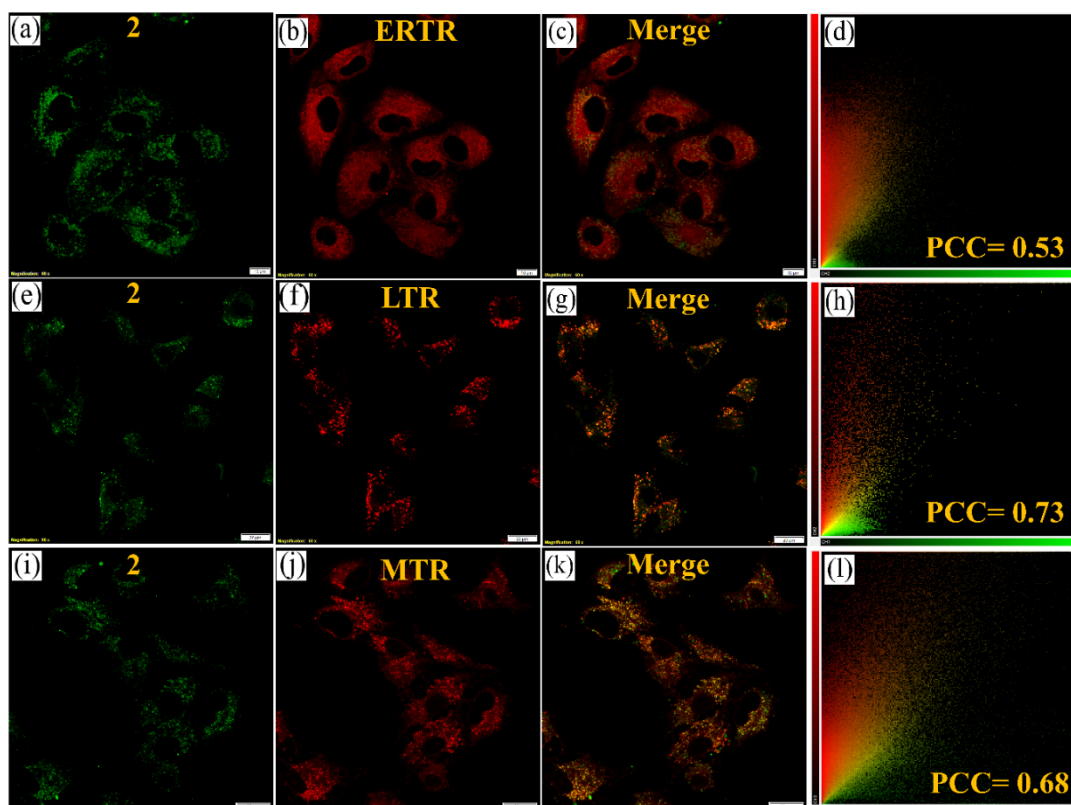

**Fig. S37** Confocal live-cell co-localization experiments in HepG2 cells. (a), (e), and (i) show FITC channel images stained with  $2 \mu\text{M}$  **2**; (b), (f) and (j) show the TRITC channel images stained with  $0.3 \mu\text{M}$  ER-Tracker Red  $0.3 \mu\text{M}$  LysoTracker Red, and  $0.3 \mu\text{M}$  MitoTracker Red; (c), (g), and (k) show the corresponding merge images, (d), (h), and (l) show the scatter plot to get the respective Pearson's correlation coefficients. (a-c: scale bar:  $10 \mu\text{m}$ , e-g and i-k: scale bar:  $20 \mu\text{m}$ ).

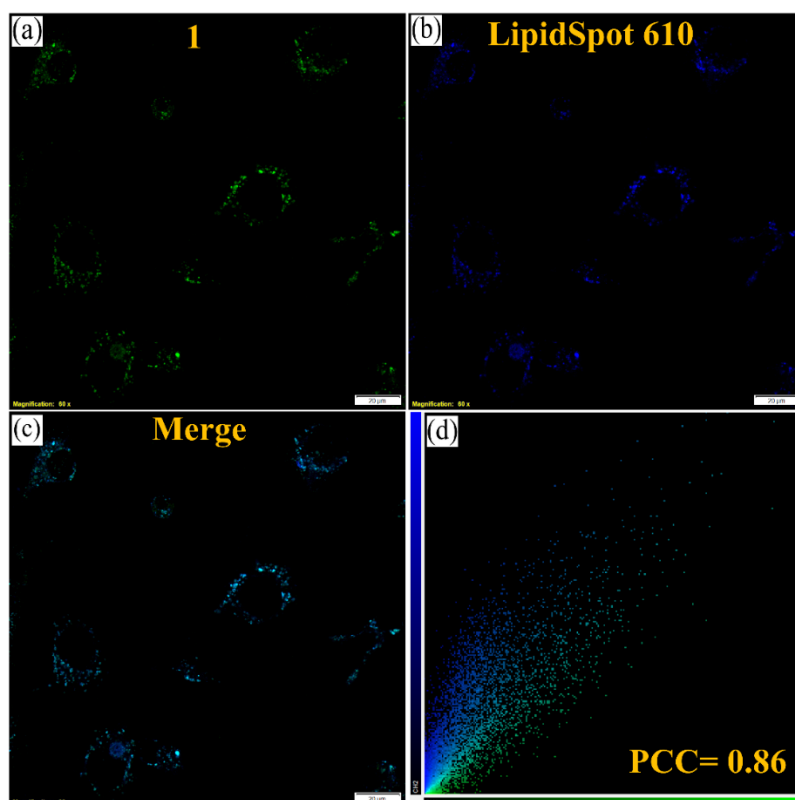

**Fig. S38** CLSM images of HepG2 cells stained with (a) 2  $\mu\text{M}$  **1**, (b) 0.5  $\mu\text{M}$  of LipidSpot 610, (c) merge image of (a) and (b), (d) scatter plot showing Pearson's correlation coefficient of  $0.86 \pm 0.02$ .

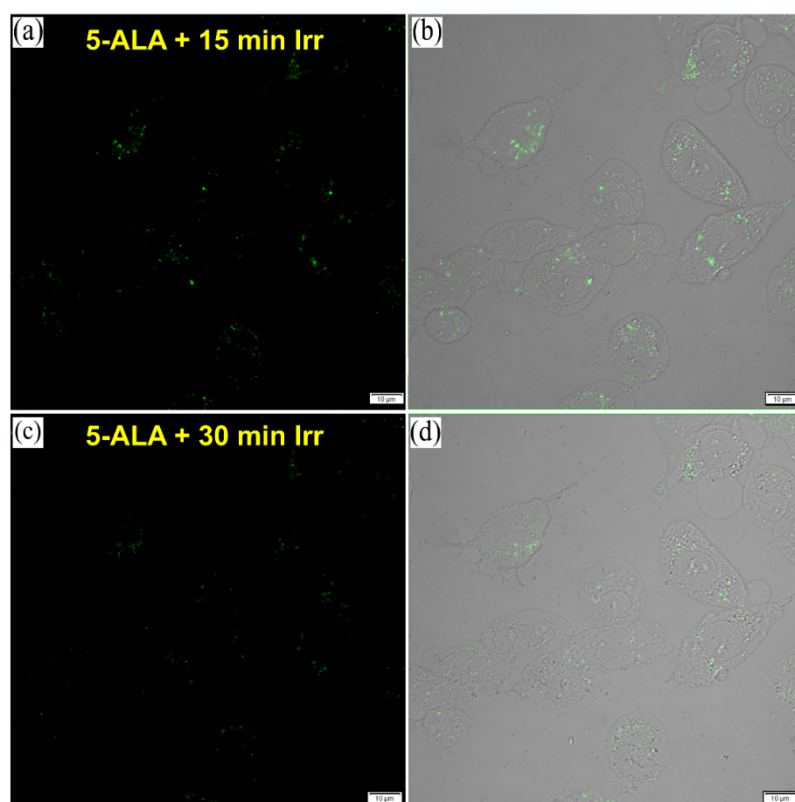

**Fig. S39** CLSM images of live HepG2 cells treated with 1 mM 5-ALA for 4 h and stained with 2  $\mu\text{M}$  **2**. (a) and (c) show FITC channel images at different irradiation time; (b) and (d) are the corresponding merge images with DIC.

**Note:** In order to detect singlet oxygen at the cellular level, 5-aminolevulinic acid (5-ALA) was used as the photosensitizer as it is known to cause the accumulation of protoporphyrin IX in the mitochondria of cancer cells which generates singlet oxygen upon light irradiation. However, in our case, the probe of interest is localizing in the lipid droplets while the 5-ALA induced  $^1\text{O}_2$  generation occurs in mitochondria. Hence, we could not get a conclusive result as can be seen in **Fig. S39**. The experiment was performed by treating the live HepG2 cells with 1 mM 5-ALA and staining with 2  $\mu\text{M}$  probe **2**. From the confocal microscopy images, no changes in fluorescence signal could be observed.
